1           **Geometric models for robust encoding of dynamical**  
2                           **information into embryonic patterns**

3

4           **Laurent Jutras-Dubé<sup>1</sup>, Ezzat El-Sherif<sup>2</sup>\*, Paul François<sup>1</sup>\***

5

6

7   1 Department of Physics, McGill University, 3600 rue University, H3A 2T8, Montreal, QC, Canada

8

9   2 Division of Developmental Biology, Department of Biology, Friedrich-Alexander-Universität Erlangen-  
10 Nürnberg, Erlangen 91058, Germany

11

12   \* Corresponding Authors

## 13 **Abstract**

14 During development, cells gradually assume specialized fates via changes of  
15 transcriptional dynamics, sometimes even within the same developmental stage. For  
16 anterior-posterior patterning in metazoans, it has been suggested that the gradual  
17 transition from a dynamic genetic regime to a static one is encoded by different  
18 transcriptional modules. In that case, the static regime has an essential role in pattern  
19 formation in addition to its maintenance function. In this work, we introduce a geometric  
20 approach to study such transition. We exhibit two types of genetic regime transitions,  
21 respectively arising through local or global bifurcations. We find that the global bifurcation  
22 type is more generic, more robust, and better preserves dynamical information. This could  
23 parsimoniously explain common features of metazoan segmentation, such as changes of  
24 periods leading to waves of gene expressions, “speed/frequency-gradient” dynamics, and  
25 changes of wave patterns. Geometric approaches appear as possible alternatives to gene  
26 regulatory networks to understand development.

## 27 **Introduction**

28 Development from one zygote to a viable animal is a complex process (Wolpert et al.,  
29 2006), comprising multiple dynamical sub-processes, including cell movements, tissue  
30 morphogenesis, dynamical gene expressions, and cellular differentiations. Eventually,  
31 cell identities are fixed by various mechanisms, such as multistable gene regulatory  
32 networks and epigenetic markers. Little is known about how this transition from a  
33 dynamic/initiation phase to a static/maintenance one is mediated. Are there general  
34 characteristics that should be matched between dynamic and static phases to mediate a  
35 robust transition?

36 In dynamical systems theory, transitions between different regimes are called  
37 'bifurcations', which are defined as qualitative changes in the dynamics of a system driven  
38 by a so-called 'control parameter' (Strogatz, 2015). Bifurcations are of many types but  
39 can be systematically classified. For instance, generic families of potentials driving the  
40 dynamics have been identified as different "catastrophes" (Poston & Stewart, 2012).  
41 While such mathematical descriptions are highly technical, they are reminiscent of the  
42 theory of epigenetic landscapes pushed forward by Waddington (Waddington, 1957). It  
43 is thus natural to ask if such classifications can be done for development. Could dynamical  
44 systems theory help us in this pursuit, and in studying development in general? The main  
45 issue here is to frame the problem in a way that allows to derive general results.

46 In recent years, numerous experimental studies have revealed that quantitative changes  
47 of gene expressions during development often followed standard predictions from  
48 dynamical systems theory (Huang et al., 2007). The Waddington landscape's analogy

49 (Jaeger & Monk, 2014) has led to many insights in cell differentiation (Graf & Enver, 2009),  
50 and recent data on cell reprogramming quantitatively validated the associated “landscape  
51 picture” (Pusuluri et al., 2018). Geometric models of development have been developed  
52 in particular cases, precisely predicting the general phenotypes of wildtype and mutants  
53 (e.g. the development of *C. elegans* vulva (Corson & Siggia, 2012) and *Drosophila* brittle  
54 patterns (Corson et al., 2017)).

55 The Clock-and-Wavefront model (Cooke & Zeeman, 1976), accounting for the observed  
56 dynamical somite (vertebrae precursors) formation, was inspired by catastrophe theory.  
57 The model predicted that a retracting wavefront translates the periodic expression of a  
58 genetic clock into a spatial pattern via “catastrophic” transitions demarcating the positions  
59 of the somites (Figure 1A). Identification of the predicted clock in 1997 (Palmeirim et al.,  
60 1997) has since led to many subsequent theoretical and experimental works, including  
61 observation of similar clocks in multiple arthropods (El-Sherif et al., 2012; Sarrazin et al.,  
62 2012). Cooke and Zeeman originally assumed that the clock is an external process, blind  
63 to the subsequent segmentation process it directs (Cooke & Zeeman, 1976). However, it  
64 has been very clear from the early experiments in (Palmeirim et al., 1997) that cellular  
65 oscillators increase their period prior to segmentation, leading to traveling waves of  
66 various signalling pathways such as Notch (Giudicelli et al., 2007; Morelli et al., 2009)  
67 (Figure 1A). Importantly, Notch waves eventually stabilize into a pattern of *delta* ligand  
68 stripes (Giudicelli & Lewis, 2004; Jiang et al., 2000), with a functional continuity between  
69 the dynamic and the static regime. Indeed, it has been shown that the dynamical phase  
70 of the clock is encoded into static rostro-caudal identities (Oginuma et al., 2010). This  
71 suggests that the observed oscillation is not a simple external pacemaker for segment

72 formation: rather, clocks, associated waves and eventual stripe formations combine into  
73 an emergent process leading to proper fate encoding. Segmentation thus possibly  
74 appears as the canonical example of transition from a dynamical gene expression regime  
75 to a static functional one.

76 Two broad scenarios have been proposed to model this process (see Figure 1). In the  
77 first scenario, the period of the individual oscillators is diverging to infinity as they become  
78 more anterior (or similarly, the frequency of the clock is going to 0), automatically giving  
79 rise to a fixed pattern (Figure 1B-F). This model corresponds to Julian Lewis' model for  
80 somitogenesis (appendix of (Palmeirim et al., 1997)), and it is possible to experimentally  
81 quantify the period divergence within this model (Giudicelli et al., 2007). This also  
82 corresponds to the implicit scenario of many theoretical models assuming that the  
83 frequency of the clock goes to 0 as cells get more anterior, such as the models in (Ares  
84 et al., 2012; Morelli & Jülicher, 2007), possibly with a sharp discontinuity suppressing  
85 period divergence (Jörg et al., 2015). Those models are appealing owing to their simplicity,  
86 since all behaviour is encoded in a dynamical frequency gradient (possibly mediated by  
87 FGF (Dubrulle & Pourquié, 2004)). However it is unclear what happens from a dynamical  
88 systems theory standpoint (a noteworthy exception being the proposal that the gradient  
89 emerges through a singularity in phase similar to the Burger's equation (Murray et al.,  
90 2013)). In particular, the pattern in this scenario literally corresponds to a frozen clock,  
91 such that there is an infinite number of local steady states corresponding to the frozen  
92 phases of the oscillators.

93 A second scenario grounded in dynamical systems theory has been proposed (François  
94 & Siggia, 2012). In this scenario, a genetic network transits from an oscillatory state to an

95 ensemble of (stable) epigenetic states (in Waddington's sense) fixing the pattern.  
96 Possible examples include the initial reaction-diffusion based model by Meinhardt  
97 (Meinhardt, 1986), or the cell-autonomous model under morphogen control evolved in  
98 (François et al., 2007) (Figure 1G). Based on geometric arguments, if bifurcations are  
99 local, the most generic model of this transition is expected to present two steps as  
100 explained in (François & Siggia, 2012). As a steep control parameter (possibly controlled  
101 by a morphogen such as FGF) decreases, the oscillation dies out through a Hopf  
102 bifurcation, leading to a single transient intermediate state. Then, for even lower values  
103 of the morphogen, one or several new (stable) states appear (technically through saddle-  
104 node bifurcations, see Figure 1—figure supplement 1). If the system translates rapidly  
105 enough from the oscillatory regime to the multistable regime, a pattern can be fixed  
106 (Figure 1H-K). Contrary to the previous scenario where the period of the clock goes to  
107 infinity, a Hopf bifurcation is associated to a finite period when the clock stops. The pattern  
108 of gene expression itself is laid thanks to multiple expression states discretizing the phase  
109 of the clock (Figure 1—figure supplement 1). Importantly, a finite number of states are  
110 observed, e.g. anterior and posterior fates within one somite (as first pointed out by  
111 Meinhardt (Meinhardt, 1982)).

112 In this paper, we revisit those ideas with explicit modelling to characterize the behaviour  
113 of systems transitioning from a dynamical regime (such as an oscillation) to a static  
114 multistable regime. We introduce two new assumptions: 1. the two different phases of  
115 developmental expression (dynamic and static) can be separated into two independent  
116 sets of transcriptional modules acting on several genes simultaneously, and 2. the system  
117 smoothly switches from one set to the other. This proposal is motivated by the recent

118 suggestion in insects that different sets of enhancers control waves of gap genes at  
119 different phases of embryonic growth (El-Sherif & Levine, 2016). Such assumptions  
120 simply explain the so-called “speed-gradient” model in *Tribolium* (Zhu et al., 2017) (see  
121 Figure 1—figure supplement 2). Using both gene network and geometric formalisms, we  
122 characterize the types of bifurcations found in systems transitioning from a dynamical to  
123 a static regime. We find that surprisingly, if the transition is smooth enough, global  
124 bifurcations appear. This situation is different from the standard scenario (Hopf and  
125 saddle-nodes) that we nevertheless recover if the transition is more non-linear. This is a  
126 generic result that is better studied and understood using geometric models. We further  
127 show that the transition through a global bifurcation is more robust than the sequence of  
128 Hopf and saddle-node bifurcations with respect to several perturbations that we simulate.  
129 Finally, we find that this model can explain many features of metazoan segmentation,  
130 such as “speed-gradient” mechanisms or changes of spatial wave profiles due to  
131 relaxation-like oscillations. This geometric approach thus offers a plausible scenario  
132 underlying embryonic patterning with many associated experimental signatures.

## 133 **Model**

134 In the following, we consider a class of developmental models based on the combination  
135 of (at least) two different transcriptional modules. Biologically, those two modules  
136 correspond to two sequential developmental phases. The main assumptions are that  
137 those transcriptional modules are globally regulated for multiple genes at the same time  
138 (which could be done for instance through chromatin global regulations) and that there is  
139 a continuous transition from one to the other. Here we focus on metazoan segmentation,  
140 notably stabilization of vertebrate segmentation clock or gap gene waves into a striped  
141 pattern of genetic expressions, but the formalism might be applicable to other patterning  
142 processes where different enhancers with distinct developmental roles have been  
143 described.

144 We use ordinary differential equations to model our system. Calling  $P$  a vector encoding  
145 the state of all proteins in any given cell (typically  $P$  corresponds to concentrations of  
146 proteins), a generic single-cell equation describing all models presented in the following  
147 is:

$$148 \quad \dot{P} = \theta_D(g) D(P) + \theta_S(g) S(P) + C(P) + \eta(g, P) \quad (1)$$

149 In Eq. 1, variable  $g$  encodes an external control parameter of the developmental transition.  
150 For example,  $g$  could be an external morphogen concentration driving patterning, but  
151 more complex situations with feedback are possible, where  $g$  could also be part of the  
152 system (e.g. the phase difference between oscillators (Beaupeux & François, 2016;  
153 Sonnen et al., 2018)). For simplicity, we rescale variables so that  $g$  is constrained  
154 between 0 and 1. The terms  $D(P)$  and  $S(P)$  correspond to different sets of modules, their



155 influence on the dynamics being weighted by functions  $\theta_D(g)$  and  $\theta_S(g)$ , respectively.  
156 The term  $\eta(g, P)$  encodes the noise. Finally,  $C(P)$  represents dynamical terms that are  
157 independent of the transcriptional modules, such as protein degradation.

158 We focus here on the simplest two-module case, where  $S(P)$  encodes a multistable  
159 system (i.e. presenting multiple fixed points at steady state) and  $D(P)$  a dynamic system  
160 (i.e. oscillatory). In this situation we will assume  $\theta_S(0) = 1$ ,  $\theta_S(1) = 0$ ,  $\theta_D(0) = 0$ , and  
161  $\theta_D(1) = 1$ , meaning that for  $g = 1$  the network is in a pure dynamic phase, while for  $g =$   
162  $0$  the network is multistable. Details on the specific forms of  $D(P)$ ,  $S(P)$ ,  $\theta_D(g)$  and  $\theta_S(g)$   
163 are given in the following and in the Appendix. We study two types of models: gene-  
164 network like models where  $D(P)$  and  $S(P)$  explicitly model biochemical interactions  
165 between genes (such as transcriptional repression), and geometric models where  $D(P)$   
166 and  $S(P)$  directly encode flows in an abstract 2D phase space, similarly to (Corson &  
167 Siggia, 2017).

168 We model an embryo as a line of cells, corresponding to the antero-posterior axis. The  
169 dynamics within each cell (position  $x$ ) is described by Eq. 1. The only difference between  
170 cells is that the dynamics of  $g$  is a prescribed function of  $x$ , e.g. we assume that there is  
171 a function  $g(x, t)$  describing the dynamics of a morphogen. We focus on the transition  
172 between the two regimes as  $g$  continuously changes from 1 to 0 in different cells as a  
173 function of time. We will typically consider a sliding morphogen gradient moving along the  
174 antero-posterior axis with speed  $v$ , described by  $H(s(x - vt))$  where the function  $H$   
175 encodes the shape of the morphogen, and parameter  $s$  is a measure of the gradient's  
176 spatial steepness.

177 We also include noise in the system with the help of an additive Gaussian white noise.  
178 For gene networks, we follow an approach similar to the  $\tau$ -leaping algorithm (Gillespie,  
179 2001), where the variance of the noise corresponds to the sum of the production and the  
180 degradation terms (approximating independent Poisson noises). A multiplicative noise  
181 intensity term  $\sqrt{1/\Omega}$  is introduced, where  $\Omega$  can be interpreted as the typical concentration  
182 of the proteins in the system, so that bigger  $\Omega$  corresponds to lower noise. In addition, we  
183 add diffusion coupling the cells in the stochastic gene network models. For the geometric  
184 model, the variance of the noise is held independent of the position  $x$ . A more detailed  
185 description of the noise and diffusion terms is provided in the Appendix.

186 All source codes and data used for this paper are available at :

187 [https://github.com/laurentjutrasdube/Dual-](https://github.com/laurentjutrasdube/Dual-Regime_Geometry_for_Embryonic_Patterning)  
188 [Regime\\_Geometry\\_for\\_Embryonic\\_Patterning](https://github.com/laurentjutrasdube/Dual-Regime_Geometry_for_Embryonic_Patterning)

## 189 **Results**

### 190 **A model for the transition between two genetic modules: Hopf vs. SNIC.**

191 In (Zhu et al., 2017), it was suggested that the transition from a “wave-like” behaviour to  
192 a static pattern during *Tribolium* segmentation was mediated by a smooth transition from  
193 one set of modules (corresponding to the oscillatory phase) towards another one  
194 (corresponding to the fixed pattern). This explained the “speed-gradient” mechanism  
195 where the typical time-scale of the dynamical system depends strongly on an external  
196 gradient (in this case the concentration of *Caudal*). In the Appendix, we further study the  
197 associated bifurcation, and observe that new fixed points corresponding to the  
198 stabilization of gap gene expressions appear on the dynamical trajectory of those gap  
199 genes (Figure 1—figure supplement 2). In simple words, the gap gene expression pattern  
200 slowly “freezes” without any clear discontinuity in its behaviour from the dynamic to the  
201 static phase, which is reminiscent of the “infinite-period” scenario displayed on Figure 1.

202 We first aim to generalize this observed property. A simple way to generate many waves  
203 of genetic expressions (as in the gap-gene system described above) is to consider an  
204 oscillatory process, so that each wave of the oscillation corresponds to a wave of gap  
205 genes. We are not saying here that the gap-gene system is an oscillator, but rather that  
206 its dynamics can be encompassed into a bigger oscillator (which has actually been  
207 suggested as an evolutionary scenario (Verd et al., 2018)). The other advantage of  
208 considering oscillators is that we can better leverage dynamical systems theory to identify  
209 and study the bifurcations. Furthermore, it allows for a better connection with oscillatory  
210 segmentation processes in vertebrates and other arthropods.

211 We thus start with an idealized gene regulatory network with 3 genes under the control of  
212 two regulatory modules (Figure 2). In the dynamic phase  $D(P)$ , we assume that the 3  
213 genes are oscillating with a repressilator dynamics (Elowitz & Leibler, 2000), so that the  
214 system keeps a reference dynamical attractor and an associated period. In the static  
215 phase  $S(P)$ , we assume that the module encodes a tristable system via mutual repression  
216 (Figure 2A).

217 We study the dynamics in a simulated embryo under the control of a regressing front of  
218  $g$  (Figure 2B). Transition from the dynamic module to the static module is expected to  
219 form a pattern by translating the phase of the oscillator into different fates, implementing  
220 a clock and wavefront process similar in spirit to the one in (François et al., 2007). We  
221 compare two versions of this model, presenting the two different behaviours that we found.  
222 In Model 1 (Figure 2C-H), the weights of the two modules are non-linear in  $g$ :  $\theta_D(g) = g^2$   
223 and  $\theta_S(g) = (1 - g)^2$  (Figure 2C). In Model 2 (Figure 2I-N), the weights of the two  
224 modules are linear in  $g$ :  $\theta_D(g) = g$  and  $\theta_S(g) = 1 - g$  (Figure 2I). We note that the initial  
225 and final attractors of both models are identical. Importantly, only the **transition** from one  
226 set of modules (and thus one type of dynamics) to the other is different. This two-module  
227 system thus offers a convenient way to compare the performance of different modes of  
228 developmental transition while keeping the same “boundary conditions” (i.e. the same  
229 initial and final attractors).

230 Figure 2E and Figure 2K show the kymographs for both models without noise, with  
231 behaviours of individual cells in Figure 2D and Figure 2J. While the final patterns of both  
232 models are the same (Figure 2F and Figure 2L), giving rise to a repeated sequence of  
233 three different fates, it is visually clear that the pattern formed with Model 2 is more precise

234 and sharper along the *entire dynamical trajectory* than the one formed with Model 1, which  
235 goes through a “blurry” transitory phase (compare mid-range values of  $g$  on Figure 2E  
236 and Figure 2K).

237 To better understand this, we plot the bifurcation diagram of both models as a function of  
238  $g$  in Figure 2G and Figure 2M. As  $g$  decreases, Model 1 is the standard case of a local  
239 Hopf bifurcation (Strogatz, 2015) happening at  $g = 0.72$ . Three simultaneous saddle-  
240 node bifurcations appear for lower values of  $g$ , corresponding to the appearance of the  
241 fixed points defining the three regions of the pattern. The behaviour of Model 2 is very  
242 different: the fixed points form on the dynamical trajectory, via three simultaneous Saddle  
243 Node on Invariant Cycle (or SNIC) bifurcations. Both models display waves  
244 corresponding to the slowing down of the oscillators, leading to a static regime. In Model  
245 1, the time-scale disappears with a finite value because of the Hopf bifurcation (Figure  
246 2H). For Model 2, it diverges because of the SNIC (Figure 2N), suggesting an explicit  
247 mechanism for the infinite-period scenario of Figure 1.

248 To further quantify the differences of performance between the two models, we introduce  
249 noise (encoded with variable  $\Omega$ , see the Model section and the Appendix) and diffusion  
250 (Figure 3A-D). We also define a mutual information metric, measuring how precisely the  
251 phase of the oscillator is read to form the final pattern (Figure 3E, see the Appendix for  
252 details), consistent with the experimental observation in vertebrate segmentation that  
253 oscillatory phases and pattern are functionally connected (Oginuma et al., 2010).  
254 Intuitively, this metric quantifies in a continuous way the number of fates encoded by the  
255 system at steady state. Ideal mutual information for the three mutually exclusive genes of  
256 Models 1 and 2 gives  $\log(3) \sim 1.6$  bits of mutual information, meaning that the pattern

257 deterministically encodes the phase of the cycle into three static fates with equal weights.  
258 While addition of noise decreases this mutual information as expected (Figure 3E), Model  
259 2 (black curves) always outperforms Model 1 (red curves). For a reasonable level of noise  
260 corresponding to a few thousands of proteins in the system, Model 2 can encode  
261  $2^{1.3} \sim 2.5$  fates, close to the optimum 3. Furthermore, for a given diffusion constant, Model  
262 1 requires a ten times smaller noise level than Model 2 to encode the same amount of  
263 mutual information, which thus indicates much better noise resistance for Model 2.

264 Those observations suggest that appearance of stable fixed points through SNIC rather  
265 than through Hopf generates a more robust pattern. The superiority of Model 2 can be  
266 rationalized in the following way: when there is a Hopf bifurcation, only one fixed point  
267 exists for a range of  $g$  values, so that all trajectories are attracted towards it. This  
268 corresponds to the “blurred” zone in the kymographs of Figure 2 and Figure 3. In presence  
269 of noise, the effect is to partially erase the memory of the phase of the oscillation when  
270 only one fixed point is present for the dynamics. Conversely, a SNIC bifurcation directly  
271 translates the phase of the oscillation into fixed points, without any erasure of phase  
272 memory, ensuring higher information transfer from the dynamic to the static phase, and  
273 therefore more precise patterning. We confirmed these results with similar 3-gene models  
274 that used Hill functions for the weights  $\theta_D$  and  $\theta_S$  (Figure 2—figure supplement 1 and  
275 Figure 3—figure supplement 1).

## 276 **Gene-free models present a similar geometry of transition**

277 Hopf and saddle-node bifurcations are “local” bifurcations: they do not in principle require  
278 complex changes of the flow or fine-tuning of the parameters to happen. As such, they  
279 are the most standard cases in many natural phenomena and in most theoretical studies.  
280 Conversely, SNIC bifurcations are “global” bifurcations (Ermentrout, 2008): they are  
281 associated to global changes of the flows and usually require some special symmetries  
282 or parameter adjustments to occur (e.g. to ensure that a saddle-node collides with a cycle).  
283 It is therefore a surprise that SNIC bifurcations spontaneously appear in the model  
284 considered here. To better understand how this is possible and if this is a generic  
285 phenomenon, we follow ideas first proposed by Corson and Siggia (Corson & Siggia,  
286 2012), and consider geometric (or gene-free) systems. We aim to see if: 1. SNIC  
287 bifurcations are generically observed, and 2. a model undergoing a SNIC bifurcation is in  
288 general more robust to perturbations than a model undergoing a Hopf bifurcation, with  
289 initial and final attractors being held fixed. We thus build 2D geometric versions of the  
290 system (variables  $y$  and  $z$ ). The dynamic module  $D(P)$  is defined by a non-harmonic  
291 oscillator on the unit circle, while the static module  $S(P)$  is defined by two fixed points, at  
292  $y = \pm 1, z = 0$  (see Figure 4A, and the Appendix for the equations). Like previously, we  
293 build a linear interpolation between the two systems as a function of  $g$  and explore the  
294 consequence on the bifurcations (Figure 4B-H). Since the flow in the system is 2D, we  
295 can also easily visualize it (Figure 4I and Figure 4—movie supplement 1).

296 In brief, this geometric approach confirms all the observations made on the gene network  
297 model of the previous section, and further clarifies the origin of the SNIC bifurcation.  
298 Because of the smooth transition between modules, the entire flow in 2D needs to

299 interpolate from a cycle to a bistable situation. When both modules have close to equal  
300 weights (around  $g = 0.5$ ), the flow and associated cycle concentrate around two future  
301 fixed points. This appears in retrospect as the most natural way to interpolate between  
302 the two situations since both types of attractor (stable limit cycle, and multiple stable fixed  
303 points) are effectively present at the same time around  $g = 0.5$ . For this reason, the  
304 oscillations are also more similar to relaxation oscillations, rapidly jumping between two  
305 values corresponding to the future fixed points. When  $g$  is further lowered, the weight of  
306 the static module dominates and “tears apart” the cycle, forming two fixed points.

307 This situation is so generic that in fact, to obtain a Hopf bifurcation, we have to  
308 mathematically reinforce the fixed point at  $y = 0$  for intermediate  $g$ . To do so, we add an  
309 extra term and use a non-linear combination of the three terms (see Figure 4—figure  
310 supplement 1). In this situation, as expected the flow first concentrates on the central  
311 fixed point at  $y = 0$ , before re-emerging in a bistable pattern for lower  $g$  (Figure 4—figure  
312 supplement 1I and Figure 4—movie supplement 2). As in the previous section, our mutual  
313 information metric confirms that the pattern is more precise when the system goes  
314 through a SNIC bifurcation rather than through a sequence of Hopf and pitchfork  
315 bifurcations (Figure 4—figure supplement 2). This thus suggests that the properties we  
316 observe are generic, and that keeping the static and dynamic attractors fixed, patterning  
317 is both more generic and more robustly encoded through a SNIC bifurcation than through  
318 a Hopf bifurcation, at least in simple low-dimension models.



## 319 **Robustness and asymmetry in the fixed points**

320 A concern with the results of the previous section might be that those mathematical  
321 models are in fact fine-tuned and too symmetrical, so that in particular when the transition  
322 occurs, both new fixed points appear for the same value of the control parameter.  
323 Furthermore, real biological networks have no reasons to be perfectly symmetrical  
324 (although evolution itself might select for more symmetrical dynamics if needed). We thus  
325 relax our hypotheses to study a system where parameters and trajectories are not  
326 symmetrical (Figures 5 and 6).

327 Going back first to the gene network model, we induce an asymmetry between the fixed  
328 points by changing thresholds of repression in the static phase (Figure 5A). The  
329 bifurcation diagrams of Figure 5B-C indicate that the asymmetry of the fixed points indeed  
330 breaks the simultaneity of appearance of all fixed points in both scenarios. We  
331 nevertheless notice that for those changes of parameters, all bifurcations still happen in  
332 a very narrow range of  $g$  for the SNIC model.

333 Asymmetry of the fixed points might therefore destroy the advantage of SNIC vs Hopf by  
334 creating a transient zone where one of the fixed points always dominates. We thus  
335 perform a comparison between Models 1 and 2 with the same asymmetric static  
336 enhancers (Figure 5, see also Figure 5—figure supplements 1 and 2, and the Appendix  
337 for details). To compare the two cases, we consider different time-scales of the  
338 morphogen gradient. The reasoning is that the slower the decay of  $g$ , the more time the  
339 system spends in a region of parameter space without all three final fixed points, allowing  
340 the system to relax and “lose” phase information. Conversely, a faster decay of  $g$  means

341 that less time is spent in a region with few fixed points, and therefore the patterns are  
342 expected to be more robust.

343 We first decrease the thresholds of repression of gene A by both genes B and C (Figure  
344 5A). Results of these simulations are shown in Figure 5: Model 2 with a SNIC bifurcation  
345 still outperforms Model 1 with Hopf and saddle-node bifurcations. In particular, it is again  
346 visually very clear on kymographs how Model 2 produces a robust and well-defined  
347 pattern at any time point of the simulations, while Model 1 gives rise to a much fuzzier  
348 pattern before the transition. Model 1 produces a robust static pattern only for a steep  
349 gradient (allowing to quickly move through the “fuzzy” phase) and a weak asymmetry in  
350 the static module (Figure 5E). It is brittle to any change of the dynamics of  $g$  (Figure 5H)  
351 or to stronger asymmetry in the static module (Figure 5—figure supplement 1E,H).  
352 Conversely, Model 2 is robust to different shapes of the morphogen (Figure 5F,I). Only  
353 for a strong asymmetry does the system lose one fixed point (Figure 5—figure  
354 supplement 1I), but even in this case transitions through a SNIC bifurcation appear  
355 superior to transitions through a Hopf bifurcation.

356 The fragility of the Hopf bifurcation to asymmetries in the parameters can be understood  
357 as follows. In the asymmetric versions of Model 1, one of the fixed points of the static  
358 term forms during the Hopf bifurcation, way before the two other fixed points form. It is  
359 therefore the only attractor available for a large range of  $g$  values. However, in Model 2  
360 the same asymmetry only favors one of the saddle-nodes for a small range of  $g$  values,  
361 generating a robust pattern. Again, we can use the mutual information metric defined  
362 above to quantify the robustness of the pattern and confirm the superiority of Model 2  
363 (Figure 5—figure supplement 2J). We also confirmed these results for the case of random

364 modifications of the repression thresholds of all interactions in the static term (Figure 5—  
365 figure supplement 2).

366 The asymmetry introduced in Figure 5 changes the shapes of the basins of attraction and  
367 the positions of the fixed points. The geometric model allows to change those features  
368 independently. The most generic way to introduce asymmetry in the system is to fix the  
369 position of the fixed points of the static regime while only changing the positions of the  
370 basins of attraction (the reason is that the future fates depend on the position of the  
371 separatrix between different regimes (Corson & Siggia, 2012)). To replicate this situation  
372 in the 2D gene-free models, we thus move the unstable fixed point of the static term along  
373 the  $y$  axis. Results of this procedure are shown on Figure 6 and confirm our results on  
374 the network-based models: Model 2 bifurcates via a SNIC and is always more robust than  
375 Model 1. When we change the positions of the fixed points in the static regime to move  
376 them away from the limit cycle (still in an asymmetric way), interestingly both Models 1  
377 and 2 now bifurcate via SNICs (Figure 6—figure supplement 1). Furthermore, we see that  
378 for Model 1, the amplitude of the limit cycle decreases before the bifurcation, while for  
379 Model 2, the amplitude increases.

380 We conclude from all those numerical perturbations that even with asymmetric basins of  
381 attraction and asymmetric parameters, transitions based on SNIC bifurcations are both  
382 more generic and more robust than the ones based on Hopf bifurcations.

## 383 **SNIC and asymmetric wave patterns**

384 It is then worth studying other properties of systems transitioning from oscillatory to static  
385 patterns. As said above, close to the SNIC bifurcation, the time-scale of the system  
386 diverges, suggesting an explicit mechanism explaining infinite-period transitions in  
387 metazoan segmentation within a dynamical systems framework. We thus compare the  
388 behaviour of the wave pattern in this model to a model where such infinite-period  
389 behaviour is assumed, namely the model of a collection of coupled oscillators from  
390 (Morelli et al., 2009). A kymograph of the spatio-temporal profile of the frequency imposed  
391 on the oscillators is shown in Figure 7A, and the dynamics of the resulting pattern  
392 formation process is shown on the kymograph of Figure 7B, with the final pattern on  
393 Figure 7C. The most striking difference is observed on the shape of the wave pattern as  
394 it moves towards the region where the pattern stabilizes. In the infinite-period scenario of  
395 (Morelli et al., 2009), the phase profile is by construction symmetric (albeit stretched in  
396 the posterior compared to the anterior, see Figure 7D,E). In the SNIC scenario, we see a  
397 clear asymmetry in the wave pattern: the transition from low to high values is sharp, while  
398 the transition from high to low values is smooth (Figure 7F, see also Figure 7—movie  
399 supplement 1 comparing different scenarios). This phenomenon is observed in all our  
400 versions of Model 2 (and is notably absent from all our versions of Model 1, see Figure  
401 7—figure supplement 1). Such asymmetries in the wave pattern are actually observed in  
402 somitogenesis, where there is a clear asymmetry in the behaviour of oscillations in the  
403 transition within one somite (i.e. anterior to posterior in one somite) vs the transition from  
404 one somite to the other (i.e. posterior of one somite to anterior of the next) (Shih et al.,  
405 2015). This suggests that our model could offer a simple explanation of wave symmetry,

406 solving the long-standing problem of the asymmetry of AP vs PA transitions, which is  
407 possibly crucial for segment polarity as first suggested by Meinhardt (Meinhardt, 1982).

## 408 **Discussion**

409 In this work, we have explored the dynamical properties of generic two-module systems,  
410 where one set of modules corresponds to a dynamic phase of genetic expression and the  
411 other corresponds to a static phase controlling embryonic patterning. The surprising and  
412 unexpected result is that those models typically present global bifurcations where new  
413 fixed points appear on the trajectories in phase space (SNIC). SNIC bifurcations come  
414 from the smooth interpolation between a flow defining an oscillator in phase space and a  
415 landscape characterized by several fixed points. The oscillating attractor then gets  
416 continuously deformed until it breaks into several fixed points, leading to the SNIC. This  
417 interpolation is a direct consequence of the assumed two-module control as shown on  
418 multiple examples above. Importantly, the overall developmental sequence in this context  
419 is emergent, since the dynamic close to the bifurcation cannot be understood  
420 independently from the static or dynamic modules only. SNIC bifurcations also provide  
421 robustness to various perturbations (since, fixed points appearing on cycles better  
422 preserve information on the oscillatory phase).

423 The most straightforward prediction of the model proposed here is the presence of several  
424 global transcriptional modules between strongly interacting genes, directly controlling the  
425 smooth changes of developmental time-scale (in a similar way to the “speed-gradient”  
426 model in (Zhu et al., 2017)). Many developmental genes are regulated by multiple  
427 “shadow” enhancers (Cannavò et al., 2016). A smooth transition between different  
428 enhancers has even been observed for gap genes in *Drosophila* (El-Sherif & Levine,  
429 2016). Global regulation of transcriptional modules could be biologically achieved through  
430 “super enhancers” regulating many genes at the same time (Hnisz et al., 2017). A non-

431 trivial prediction of our model is that the intrinsic time-scale of the system is a function of  
432 the relative balance of transcriptional activities of the modules. The transcriptional control  
433 described here naturally allows for infinite-period bifurcations, an implicit mechanism in  
434 several models of metazoan segmentation. This is to be contrasted with classical models  
435 of negative feedback oscillators such as the Goodwin model, where the time-scale is  
436 entirely controlled by degradation and is independent from transcription/translation rates  
437 (Forger, 2011), and delayed oscillators, where the time-scale is essentially controlled by  
438 transcriptional delays (Lewis, 2003).

439 Our model is controlled by an external parameter  $g$ . The natural hypothesis would be that  
440  $g$  corresponds to an actual morphogen gradient, such as *Caudal* in *Tribolium* (Zhu et al.,  
441 2017). However, in the spirit of the initial wavefront proposal by Cooke and Zeeman,  $g$   
442 could also be in some context a temporal variable, e.g. an effective timer. Recent works  
443 on somitogenesis have suggested that the segmentation front could also be coupled to  
444 the slowing down of oscillators (Lauschke et al., 2013), so that the oscillation could  
445 feedback on itself to define  $g$ . It is important to point out that in our framework the nature  
446 of the bifurcation does not depend on the nature of  $g$ , so it might be difficult to  
447 experimentally disentangle feedbacks between the bifurcations and the control parameter  
448 from actual properties of the bifurcations themselves. However, irrespective of the nature  
449 of  $g$ , period divergence would be observed close to the SNIC (and would not be observed  
450 for a Hopf bifurcation). We notice though that infinite-period scenarios could be difficult to  
451 distinguish from a Hopf bifurcation scenario (with a non negligible frequency change) by  
452 simple monitoring of oscillations : for instance, peak-to-peak measurements of the period

453 do not show a clear difference between Models 1 and 2 (see Figure 2—figure supplement  
454 2).

455 Since the SNIC bifurcations are the generic scenario that we observe in our framework,  
456 the mechanism of patterning itself remains largely robust to parameter modifications. This  
457 could explain how and why there is so much quantitative variability in segmentation  
458 mechanisms such as short/intermediate germ band segmentation (as suggested in (Zhu  
459 et al., 2017)), or somitogenesis (number of waves, rescaled period (Gomez et al., 2008)),  
460 while the qualitative dynamics itself appears very conserved (see e.g. (Krol et al., 2011)  
461 for somitogenesis). In other words, having a two-module mechanism makes the dynamics  
462 both more robust – a generic bifurcation scenario gives precise phase encoding – and  
463 more evolvable – one can vary many features of the system (e.g. basins of attractions,  
464 dynamics of  $g$ ) and still get proper patterning.

465 The dynamics in this model is smooth, with the same genes interacting to control the  
466 system in *both* the dynamic and static regimes. This is consistent with what is observed  
467 for gap genes dynamics in short germ insects (Zhu et al., 2017). For vertebrate  
468 segmentation, we do not know yet mechanistically how both regimes are controlled, but  
469 the Notch signalling pathway is known to gate information from the oscillatory to the  
470 segmented regime (Oginuma et al., 2010). An opposite view would be that the transition  
471 from dynamic to static regime is *de facto* sudden (even if it appears as smooth for other  
472 reasons). Such scenario could be realized in different ways. For instance, different  
473 enhancers could regulate completely different sets of genes in the dynamic vs static  
474 phases. The “static” genes would then interact with the “dynamic” genes only briefly  
475 during development, ensuring transmission of positional information between the static



476 and dynamic regions in a very localized region in time and space. In somitogenesis,  
477 specific genes are indeed expressed at the so-called “front” (such as *Mesp2* (Koseki et  
478 al., 2000)) and could act like gating processes transferring the information from the clock  
479 to an independent patterning system. In this case, we would be back to a sequential point  
480 of view where different regimes of development live in different regions of phase space,  
481 and the local bifurcation scenario would then be more plausible (and in fact has appeared  
482 in simulations of the evolution of patterning (François et al., 2007)). The problem with this  
483 simpler model is that it does not explain *a priori* all other phenomena described here which  
484 are direct consequences of the smooth transition from one regime to the other, including  
485 period divergence, robustness to changes of morphogen dynamics and to noise.

486 It has been known for a long time that the original Clock and Wavefront model does not  
487 require any smooth transition (such as spatial waves of genetic expression) for patterning.  
488 But the slowdown of gene expression dynamics during metazoan segmentation appear  
489 to be smooth, and the segmentation process itself is experimentally robust to many  
490 perturbations, such as changes in morphogen dynamics (Zhu et al., 2017). The model  
491 proposed here provides a possible explanation for a smooth robust transition, with a non-  
492 trivial (global) bifurcation. Further experimental and theoretical studies are required to  
493 assess the importance of smooth transitions for encoding dynamic information into spatial  
494 patterns of genetic expressions.

## 495 **Acknowledgements**

496 We thank members of the François and El-Sherif groups for insightful discussions.

497

498

## 499 **Competing Interests**

500 The authors declare that no competing interests exist.

501

502

## 503 **References**

504 Ares, S., Morelli, L. G., Jörg, D. J., Oates, A. C., & Jülicher, F. F. (2012). Collective  
505 modes of coupled phase oscillators with delayed coupling. *Physical Review Letters*,  
506 *108*(20), 204101.

507 Beaupeux, M., & François, P. (2016). Positional information from oscillatory phase  
508 shifts : insights from in silico evolution. *Physical Biology*, *13*(3), 1–14.

509 Cannavò, E., Khoueiry, P., Garfield, D. A., Geeleher, P., Zichner, T., Gustafson, E. H.,  
510 Ciglar, L., Korbel, J. O., & Furlong, E. E. M. (2016). Shadow enhancers are  
511 pervasive features of developmental regulatory networks. *Current Biology*, *26*(1),  
512 38–51.

513 Cooke, J., & Zeeman, E. C. (1976). A clock and wavefront model for control of the  
514 number of repeated structures during animal morphogenesis. *Journal of Theoretical*

- 515 *Biology*, 58(2), 455–476.
- 516 Corson, F., Couturier, L., Rouault, H., Mazouni, K., & Schweisguth, F. (2017). Self-  
517 organized Notch dynamics generate stereotyped sensory organ patterns in  
518 *Drosophila*. *Science*, 356(6337), eaai7407.
- 519 Corson, F., & Siggia, E. D. (2012). Geometry, epistasis, and developmental patterning.  
520 *Proceedings of the National Academy of Sciences*, 109(15), 5568–5575.
- 521 Corson, F., & Siggia, E. D. (2017). Gene free methodology for cell fate dynamics during  
522 development. *ELife*, 6, e30743.
- 523 Dubrulle, J., & Pourquié, O. (2004). fgf8 mRNA decay establishes a gradient that  
524 couples axial elongation to patterning in the vertebrate embryo. *Nature*, 419–422.
- 525 El-Sherif, E., Averof, M., & Brown, S. J. (2012). A segmentation clock operating in  
526 blastoderm and germband stages of *Tribolium* development. *Development*,  
527 139(23), 4341–4346.
- 528 El-Sherif, E., & Levine, M. (2016). Shadow enhancers mediate dynamic shifts of gap  
529 gene expression in the *drosophila* embryo. *Current Biology*, 26(9), 1164–1169.
- 530 Elowitz, M. B., & Leibler, S. (2000). A synthetic oscillatory network of transcriptional  
531 regulators. *Nature*, 403(6767), 335–338.
- 532 Ermentrout, B. (2008). Ermentrout-Kopell canonical model. *Scholarpedia*, 3(3), 1398.
- 533 Forger, D. B. (2011). Signal processing in cellular clocks. *Proceedings of the National*  
534 *Academy of Sciences*, 108(11), 4281–4285.
- 535 François, P., Hakim, V., & Siggia, E. D. (2007). Deriving structure from evolution:  
536 metazoan segmentation. *Molecular Systems Biology*, 3, 9.
- 537 François, P., & Siggia, E. D. (2012). Phenotypic models of evolution and development:

- 538 geometry as destiny. *Current Opinion in Genetics & Development*, 22(6), 627–633.
- 539 Gillespie, D. T. (2001). Approximate accelerated stochastic simulation of chemically  
540 reacting systems. *The Journal of Chemical Physics*, 115(4), 1716.
- 541 Giudicelli, François, & Lewis, J. (2004). The vertebrate segmentation clock. *Current*  
542 *Opinion in Genetics & Development*, 14(4), 407–414.
- 543 Giudicelli, F., Ozbudak, E. M., Wright, G. J., & Lewis, J. (2007). Setting the tempo in  
544 development: an investigation of the zebrafish somite clock mechanism. *PLoS*  
545 *Biology*, 5(6), e150.
- 546 Gomez, C., Ozbudak, E. M., Wunderlich, J., Baumann, D., Lewis, J., & Pourquié, O.  
547 (2008). Control of segment number in vertebrate embryos. *Nature*, 454(7202), 335–  
548 339.
- 549 Graf, T., & Enver, T. (2009). Forcing cells to change lineages. *Nature*, 462(7273), 587–  
550 594.
- 551 Hnisz, D., Shrinivas, K., Young, R. A., Chakraborty, A. K., & Sharp, P. A. (2017). A  
552 phase separation model for transcriptional control. *Cell*, 169(1), 13–23.
- 553 Huang, S., Guo, Y., May, G., & Enver, T. (2007). Bifurcation dynamics in lineage-  
554 commitment in bipotent progenitor cells. *Developmental Biology*, 305(2), 695–713.
- 555 Jaeger, J., & Monk, N. (2014). Bioattractors: dynamical systems theory and the  
556 evolution of regulatory processes. *The Journal of Physiology*, 592(11), 2267–2281.
- 557 Jiang, Y. J., Aerne, B. L., Smithers, L., Haddon, C., Ish-Horowicz, D., & Lewis, J.  
558 (2000). Notch signalling and the synchronization of the somite segmentation clock.  
559 *Nature*, 408(6811), 475–479.
- 560 Jörg, D. J., Morelli, L. G., Soroldoni, D., Oates, A. C., & Jülicher, F. (2015). Continuum

561 theory of gene expression waves during vertebrate segmentation. *New Journal of*  
562 *Physics*, 17(9), 093042.

563 Koseki, H., Saga, Y., Takahashi, Y., Koizumi, K., Takagi, A., Kitajima, S., & Inoue, T.  
564 (2000). *Mesp2* initiates somite segmentation through the Notch signalling pathway.  
565 *Nature Genetics*, 25(4), 390–396.

566 Krol, A. J., Roellig, D., Dequéant, M.-L., Tassy, O., Glynn, E., Hattem, G., Mushegian,  
567 A., Oates, A. C., & Pourquié, O. (2011). Evolutionary plasticity of segmentation  
568 clock networks. *Development*, 138(13), 2783–2792.

569 Lauschke, V. M., Tsiairis, C. D., François, P., & Aulehla, A. (2013). Scaling of embryonic  
570 patterning based on phase-gradient encoding. *Nature*, 493(7430), 101–105.

571 Lewis, J. (2003). Autoinhibition with transcriptional delay: a simple mechanism for the  
572 zebrafish somitogenesis oscillator. *Current Biology*, 13(16), 1398–1408.

573 Meinhardt, H. (1982). *Models of biological pattern formation*. New York, NY: Academic  
574 Press.

575 Meinhardt, H. (1986). Models of segmentation. In *Somites in developing embryos* (pp.  
576 179–189). Boston, MA: Springer.

577 Morelli, L. G., Ares, S., Herrgen, L., Schröter, C., Jülicher, F. F., & Oates, A. C. (2009).  
578 Delayed coupling theory of vertebrate segmentation. *HFSP Journal*, 3(1), 55–66.

579 Morelli, L. G., & Jülicher, F. F. (2007). Precision of genetic oscillators and clocks.  
580 *Physical Review Letters*, 98(22), 228101.

581 Murray, P. J., Maini, P. K., & Baker, R. E. (2013). Modelling Delta-Notch perturbations  
582 during zebrafish somitogenesis. *Developmental Biology*, 373(2), 407–421.

583 Oginuma, M., Takahashi, Y., Kitajima, S., Kiso, M., Kanno, J., Kimura, A., & Saga, Y.

- 584 (2010). The oscillation of Notch activation, but not its boundary, is required for  
585 somite border formation and rostral-caudal patterning within a somite.  
586 *Development*, 137(9), 1515–1522.
- 587 Palmeirim, I., Henrique, D., Ish-Horowicz, D., & Pourquié, O. (1997). Avian hairy gene  
588 expression identifies a molecular clock linked to vertebrate segmentation and  
589 somitogenesis. *Cell*, 91(5), 639–648.
- 590 Poston, T., & Stewart, I. (2012). *Catastrophe theory and its applications*. London: Dover  
591 Publications.
- 592 Pusuluri, S. T., Lang, A. H., Mehta, P., & Castillo, H. E. (2018). Cellular reprogramming  
593 dynamics follow a simple 1D reaction coordinate. *Physical Biology*, 15(1), 16001.
- 594 Sarrazin, A. F., Peel, A. D., & Averof, M. (2012). A segmentation clock with two-  
595 segment periodicity in insects. *Science*, 336(6079), 338–341.
- 596 Shih, N. P., François, P., Delaune, E. A., & Amacher, S. L. (2015). Dynamics of the  
597 slowing segmentation clock reveal alternating two-segment periodicity.  
598 *Development*, 142(10), 1785–1793.
- 599 Sonnen, K. F., Lauschke, V. M., Uraji, J., Falk, H. J., Petersen, Y., Funk, M. C.,  
600 Beaupeux, M., François, P., Merten, C. A., & Aulehla, A. (2018). Modulation of  
601 phase shift between Wnt and Notch signaling oscillations controls mesoderm  
602 segmentation. *Cell*, 172(5), 1079–1090.e12.
- 603 Strogatz, S. H. (2015). *Nonlinear dynamics and chaos: with applications to physics,*  
604 *biology, chemistry, and engineering*. Boca Raton, FL: CRC Press.
- 605 Verd, B., Clark, E., Wotton, K. R., Janssens, H., Jiménez-Guri, E., Crombach, A., &  
606 Jaeger, J. (2018). A damped oscillator imposes temporal order on posterior gap

607           gene expression in *Drosophila*. *PLoS Biology*, 16(2), e2003174.

608   Waddington, C. H. (1957). *The strategy of the genes*. London: Routledge.

609   Wolpert, L., Smith, J., Jessel, T., Lawrence, P., Robertson, E., & Meyerowitz, E. (2006).

610           *Principles of development*. Oxford University Press.

611   Zhu, X., Rudolf, H., Healey, L., François, P., Brown, S. J., Klingler, M., & El-Sherif, E.

612           (2017). Speed regulation of genetic cascades allows for evolvability in the body

613           plan specification of insects. *Proceedings of the National Academy of Sciences*,

614           114(41), E8646–E8655.

615

## 616 Figures

### 617 Figure 1: Scenarios for segment formation.

618 (A) General phenomenology of segment or somite formation. The white to blue gradient represents the  
 619 oscillating system (e.g. some Notch signaling pathway  
 620 oscillating system (e.g. some Notch signaling pathway  
 621 gene). The determination front (red vertical line)  
 622 sweeps the embryo in the posterior direction (red arrow)  
 623 and translates the periodic expression of a genetic  
 624 clock into a spatial pattern. (B-F) Pattern formation with  
 625 the infinite-period scenario. (B) Period divergence is  
 626 imposed as control parameter  $g$  decreases from 1 to 0.  
 627 (C) Two simulated cells with the same dynamics of  $g$   
 628 end up with different final values of the phase. (D-E)  
 629 Kymographs showing respectively the dynamics of  
 630 parameter  $g$  used in the simulated embryo and the  
 631 dynamics of the genetic clock. (F) Schematic of the  
 632 final pattern. (G-K) Pattern formation with the Hopf  
 633 scenario. (G) Schematic of the gene regulatory network.  
 634 (H) Depending on the dynamics of  $g$ , simulated cells  
 635 can end up with either a high or a low concentration of  
 636 protein  $E$ . (I-J) Kymograph showing respectively the  
 637 dynamics of parameter  $g$  used in the simulated embryo  
 638 and the dynamics of protein  $E$ . (K) Schematic of the  
 639 final pattern. The boundary between two segments (“ $S_i$ ”)  
 640 is set arbitrarily at the transition from high to low  
 641 concentrations of protein  $E$ .

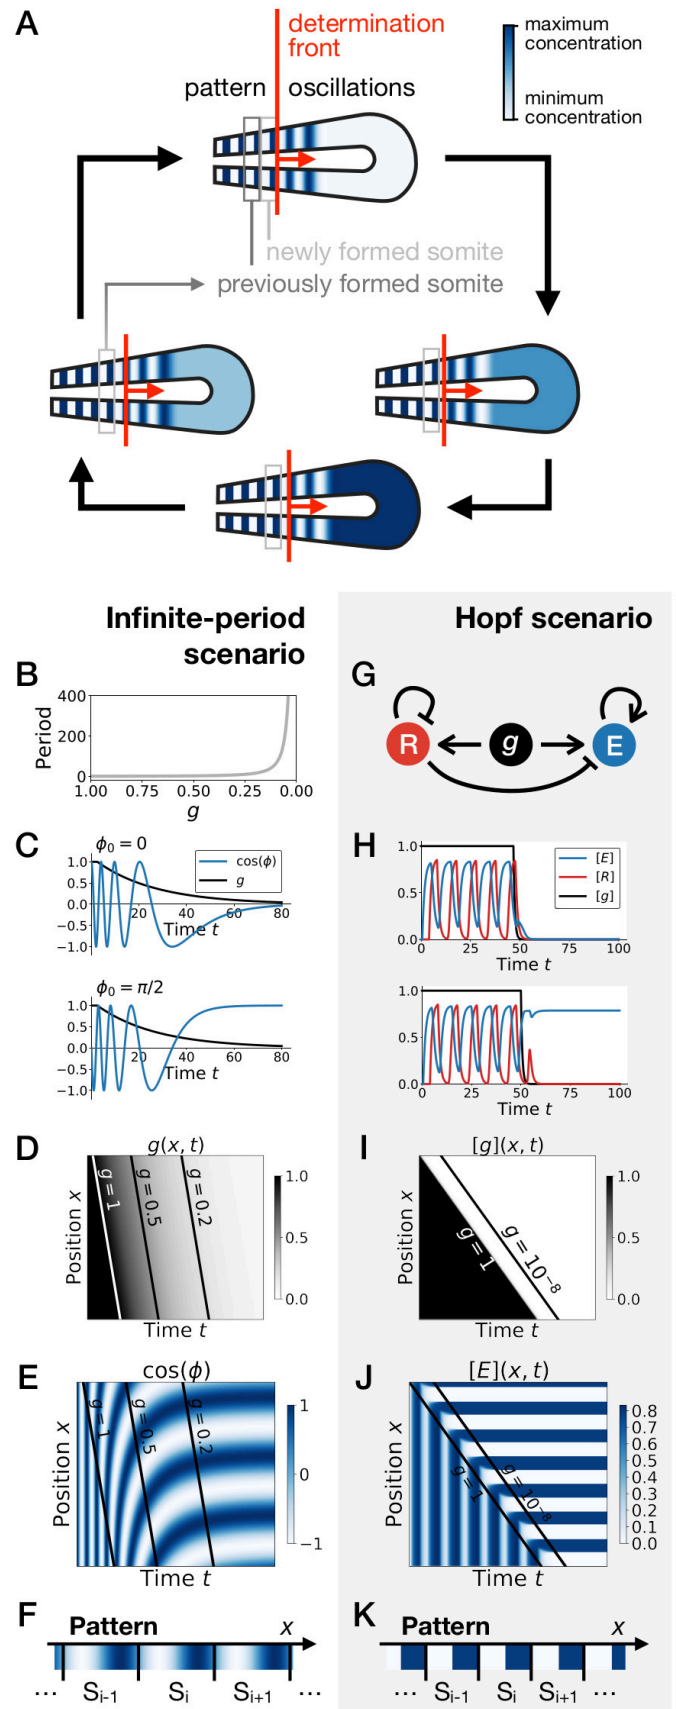



642 **Figure 2: 3-gene models for pattern**  
 643 **formation.** (A) Schematic of the gene regulatory  
 644 networks encoded by the dynamic term (dotted line)  
 645 and the static term (solid line). (B) Kymograph showing  
 646 the dynamics of parameter  $g$  used in the simulated  
 647 embryos for both Models 1 and 2. (C-H) Simulation  
 648 results for Model 1. (C) Weights of the dynamic (dotted  
 649 line) and static (solid line) modules as a function of  
 650 parameter  $g$ . (D) Gene concentration and value of  
 651 parameter  $g$  inside a representative simulated cell as a  
 652 function of time. (E) Kymograph showing the dynamics  
 653 of gene expression in the simulated embryo.  
 654 Transparent colors are used to represent the  
 655 concentration of the 3 genes, so that mixes of the 3  
 656 genes can be easily perceived. Genes  $A$ ,  $B$ , and  $C$  are  
 657 shown in transparent white, blue and purple,  
 658 respectively. Simulated cells with intermediate  
 659 concentrations of all genes appear grey. (F) Schematic  
 660 of the final pattern. (G) Bifurcation diagram showing the  
 661 types of dynamics available to the simulated embryo as  
 662 a function of parameter  $g$ . The maximum and minimum  
 663 concentrations of gene  $A$  on the stable limit cycles are  
 664 shown in black. Stable and unstable fixed points are  
 665 shown in green and red, respectively. “SN” stands for  
 666 saddle-node bifurcation. (H) Period (grey line) and  
 667 amplitude (red line) of the oscillations along the stable  
 668 limit cycle. (I-N) Simulation results for Model 2.

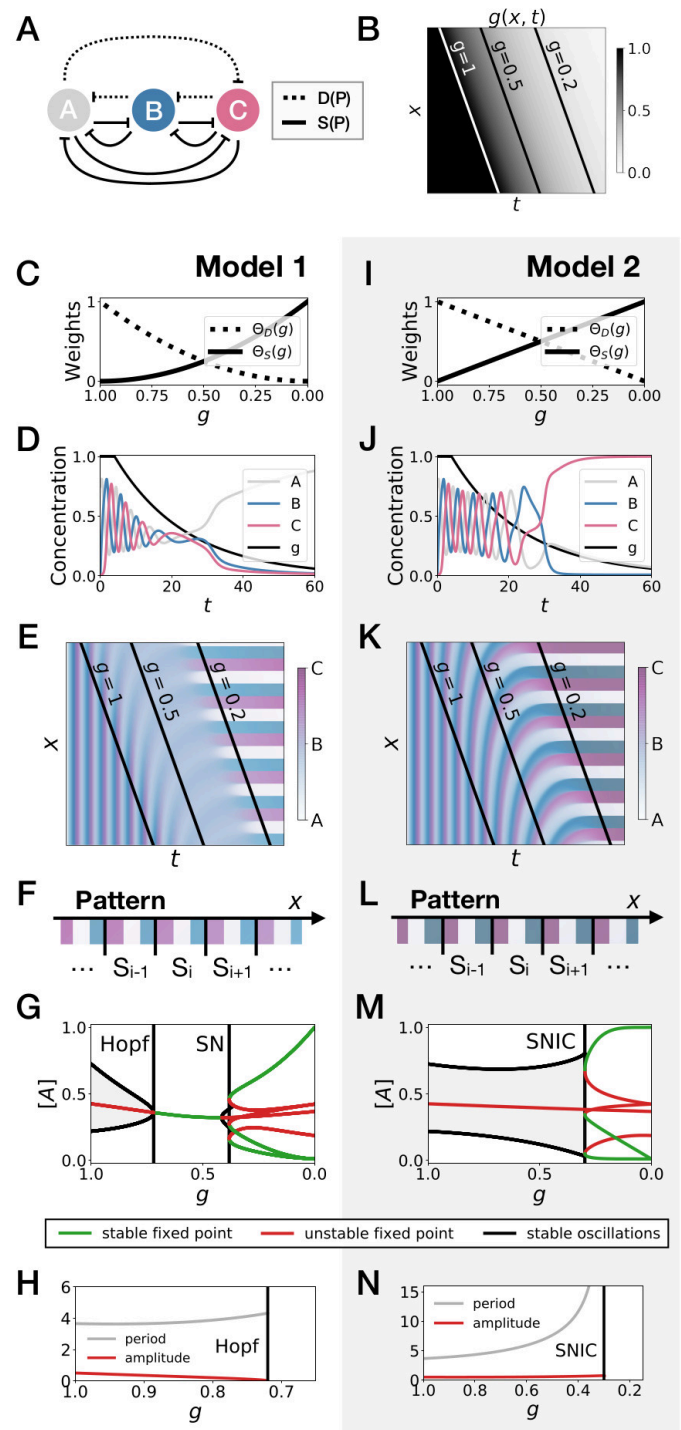

669 **Figure 3: Stochastic simulations of the 3-**  
 670 **gene models.** (A-D) Kymographs showing the  
 671 stochastic dynamics of gene expression in simulated  
 672 embryos. The specific values of the typical  
 673 concentration  $\Omega$  and of the diffusion constant  $D$  used to  
 674 generate each kymograph are indicated on the panels.  
 675 The concentration of the three genes at the last  
 676 simulated time point is shown schematically in the  
 677 lower part of each panel. (E) Mutual information as a  
 678 function of typical concentration  $\Omega$  for Model 1 (red lines)  
 679 and Model 2 (black lines). Paler colors correspond to  
 680 lower values of the diffusion constant  $D$ . The thick  
 681 horizontal black line indicates the ideal mutual  
 682 information for 3 mutually exclusive genes. Note that  
 683 higher values of  $\Omega$  correspond to lower noise levels.

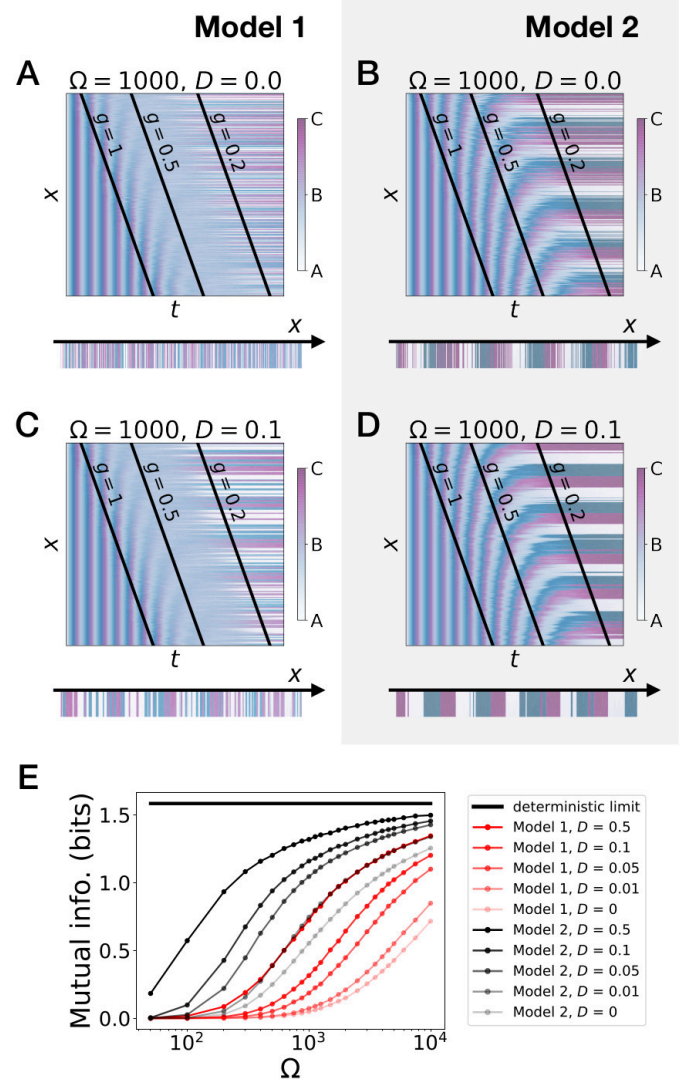

684 **Figure 4: 2D geometric model for pattern**

685 **formation.** (A) Schematic of the flow encoded by the

686 dynamic and static terms. The grey circle represents

687 oscillations on the unit circle. Green and red dots

688 represent unstable and stable fixed points, respectively.

689 (B) Weights of the dynamic (dotted line) and static

690 (solid line) modules as a function of parameter  $g$ . (C)

691 Values of geometric coordinates  $y$  and  $z$  and of

692 parameter  $g$  in a simulated cell as a function of time.

693 (D-E) Kymographs showing respectively the dynamics

694 of parameter  $g$  used in the simulated embryo and the

695 dynamics of coordinate  $y$ . (F) Schematic of the final

696 pattern. (G) Bifurcation diagram showing the types of

697 dynamics available to the simulated embryo as a

698 function of parameter  $g$ . The maximum and minimum

699 values of coordinate  $y$  on the stable limit cycles are

700 shown in black. Stable and unstable fixed points are

701 shown in green and red, respectively. (H) Period (grey

702 line) and amplitude (red line) of the oscillations. (I) Flow

703 in phase space for different values of parameter  $g$ . The

704 same color scheme than panel A is used to represent

705 the cycles and the fixed points. Positions along the limit

706 cycle at time points separated by a fixed time interval

707 are indicated with black dots, so that variations of the

708 speed of the oscillations along the limit cycle can be

709 visualized. The yellow and orange lines represent the  $y$

710 and  $z$  nullclines, respectively.

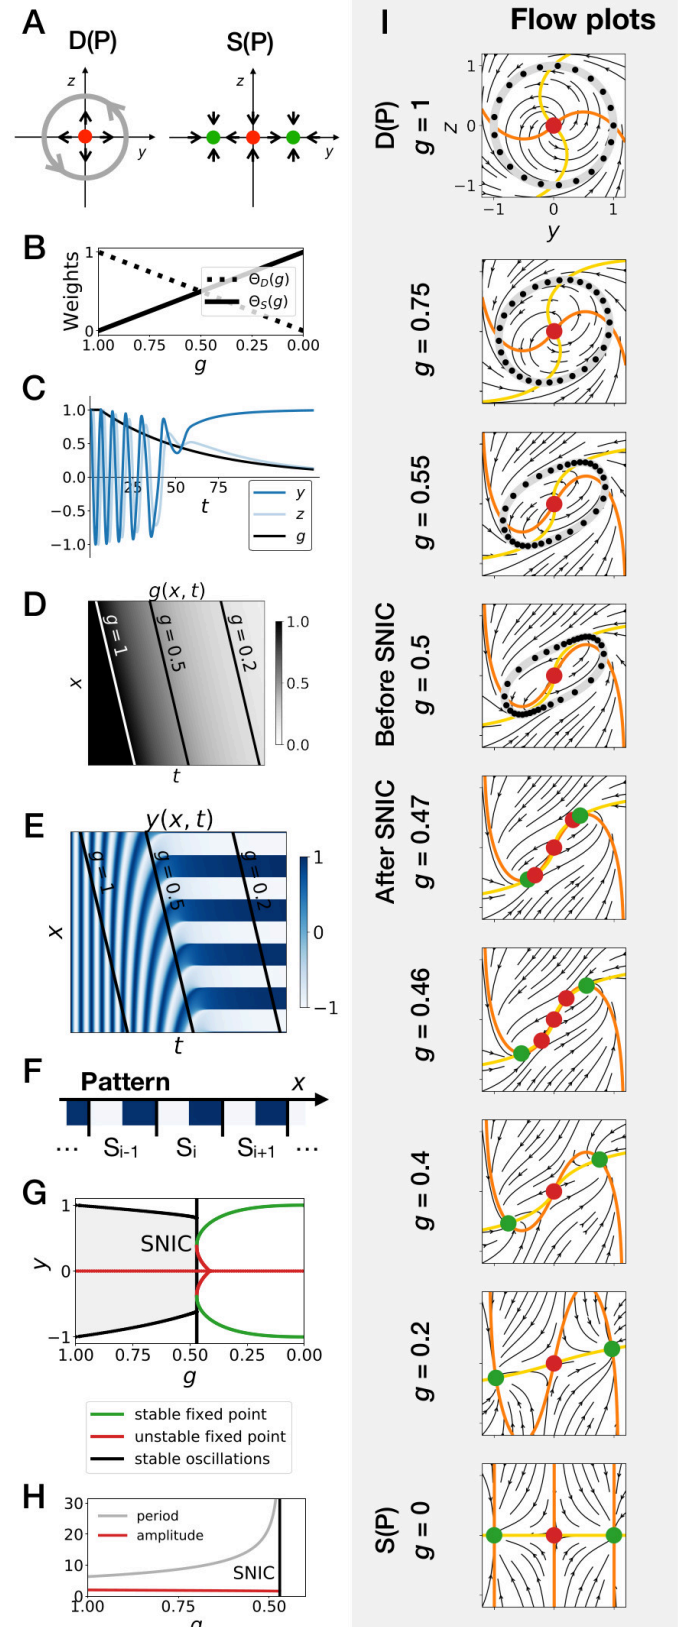

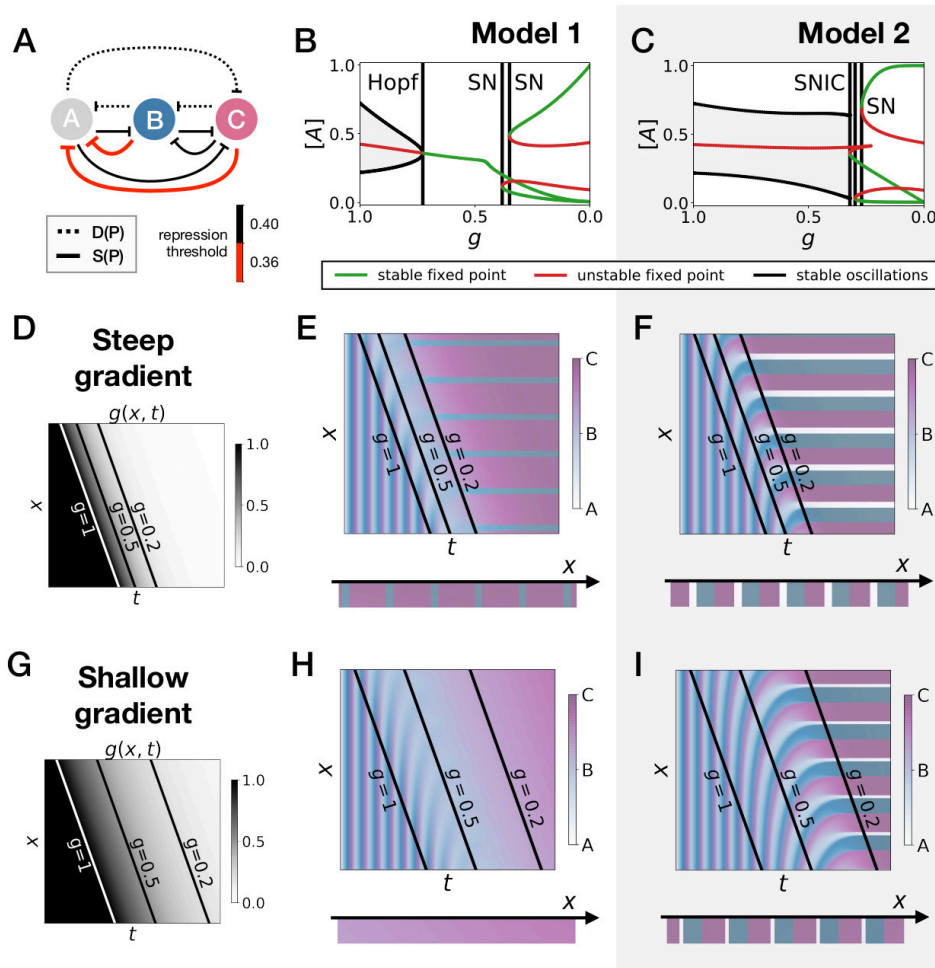

711 **Figure 5: Perturbation of the morphogen gradient steepness in asymmetric 3-gene**

712 **models.** (A) Schematic of the gene regulatory networks encoded by the dynamic term (dotted line) and

713 the static term (solid line). The thick red lines indicate stronger repression than the black lines (see the

714 parameters in the Appendix). (B-C) Bifurcation diagram showing the types of dynamics available in Models

715 1 and 2. The maximum and minimum concentrations of gene A on the stable limit cycles are shown in black.

716 Stable and unstable fixed points are shown in green and red, respectively. The main bifurcations are

717 identified with vertical lines. "SN" stands for saddle-node bifurcation. (D-F) Simulation results for a steep

718 gradient of parameter  $g$ . (D) Kymograph showing the dynamics of parameter  $g$  used in the simulated

719 embryos for both Models 1 and 2. (E-F) Kymograph showing the dynamics of gene expression in the

720 simulated embryo of Models 1 and 2. The concentration of the three genes at the last simulated time point

721 is shown schematically in the lower part of the panels. (H-J) Simulation results for a shallow gradient of

722 parameter  $g$ .



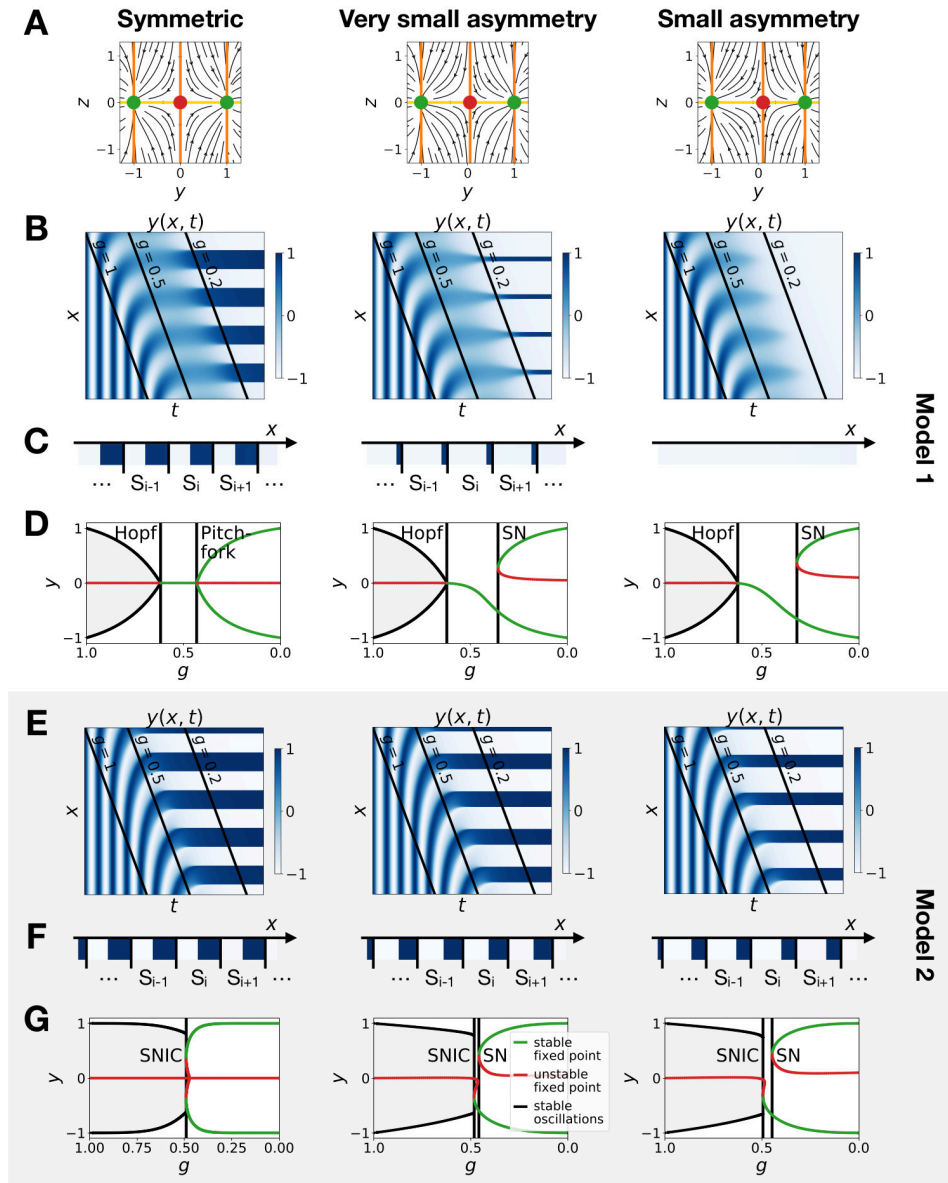

723 **Figure 6: Perturbation of the morphogen gradient steepness in geometric models.**

724 (A) Flow plots showing the changes of geometry of the static module. (B-C) Corresponding kymographs  
 725 and final patterns for Model 1. (D) Associated bifurcations diagrams. “SN” stands for saddle-node  
 726 bifurcation. (E-F) Corresponding kymographs and final patterns for Model 2. (G) Associated bifurcation  
 727 diagrams.

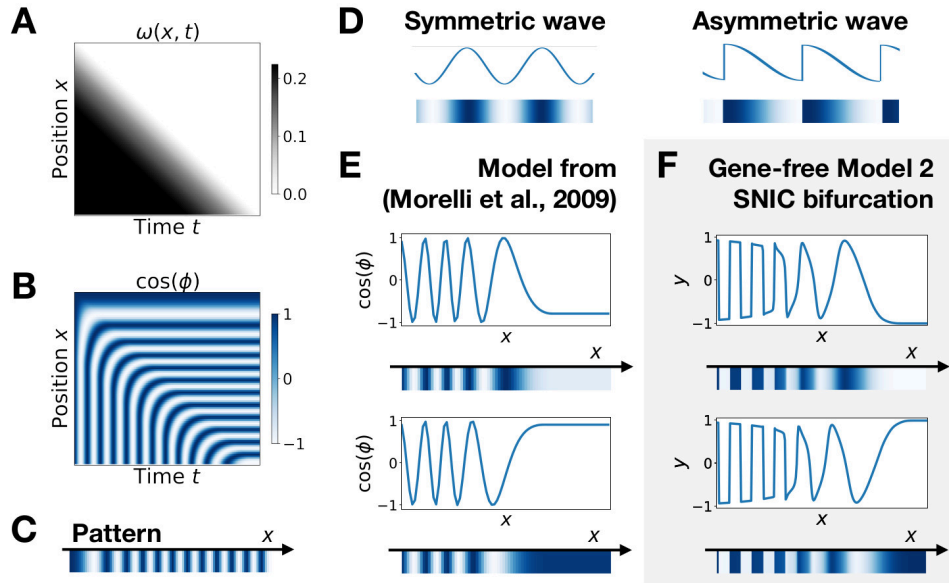

728 **Figure 7: Wave pattern in different models for the infinite-period scenario.**

729 (A) Frequency profile for the simulation of the model of coupled oscillators from (Morelli et al., 2009).

730 (B-C) Kymograph showing the dynamics of the phase of the oscillators and the corresponding final pattern.

731 (D) Two examples of possible wave patterns (symmetrical vs asymmetrical). (E) Wave pattern for the model

732 of Panels (A-C) for two different time points. (F) Wave pattern for Model 2 of Fig. 4 for two different time

733 points.

## 734 Supplementary Figures

### 735 Figure 1—figure supplement 1: Bifurcation

### 736 analysis of the Hopf scenario of Fig. 1.

737 (A) Bifurcation diagram showing the types of dynamics  
738 available to the system as a function of morphogen  $g$   
739 concentration. The maximum and minimum  
740 concentrations of gene  $E$  on the stable limit cycle are  
741 shown in black. Stable fixed points are shown in green.  
742 The main bifurcation events are identified with vertical  
743 lines. “SN” stands for saddle-node bifurcation. (B)  
744 Period of the oscillations along the limit cycle.

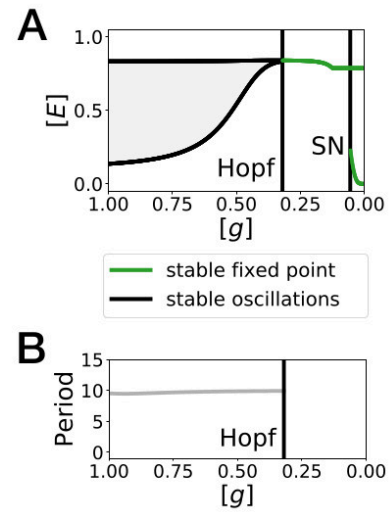

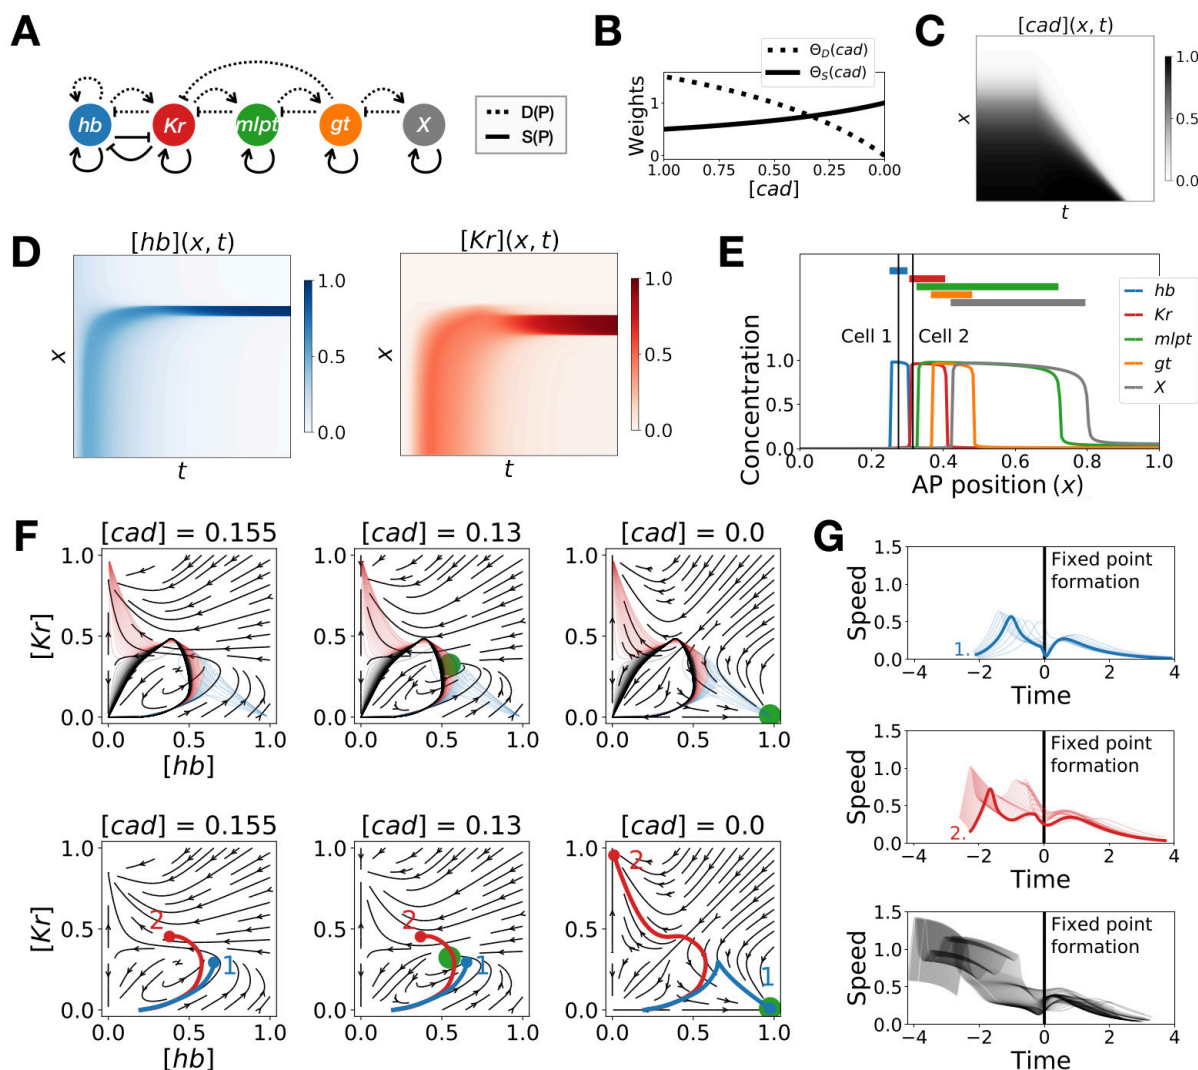

745 **Figure 1—figure supplement 2: Two-enhancer model for Tribolium segmentation.**

746 (A) Schematic of the gene regulatory networks encoded by the dynamic term (dotted line) and the static

747 term (solid line). (B) Weights of the dynamic (dotted line) and static (solid line) enhancers. (C) Kymograph

748 showing the dynamics of the concentration of morphogen *caudal* (*cad*) used in the simulated embryo. (D)

749 Kymographs showing the dynamics of the concentration of proteins *hunchback* (*hb*) and *Krüppel* (*Kr*). (E)

750 Final pattern of protein expression. The vertical lines identify the positions of the two cells whose trajectories

751 are shown on the bottom subpanels of panel F. (F) Flow in the phase space defined by *hb* and *Kr* for

752 different concentrations of morphogen *cad*. The green disk represents the stable fixed point corresponding

753 to the fate with high concentration of *hb*. (Top subpanels) Projection of the trajectories of all cells in the *hb*-

754 *Kr* phase space. The trajectories of cells that end up with high *hb*, *Kr*, and *X* concentrations are represented



755 with transparent blue, red and black lines, respectively. (*Bottom subpanels*) Projection of the trajectories of  
756 the two cells identified on panel E. For a given cell, the part of the trajectory that is shown is from the initial  
757 time point until the time point when *cad* reaches the concentration used to compute the flow. (G) Speed in  
758 phase space of all cells as a function of the time since the formation of the fixed point. The top, middle, and  
759 bottom subpanels show the speed of the cells that end up with high *hb*, *Kr*, and *X* concentrations at the end  
760 of the simulation, respectively. The thick blue and red lines correspond to the speed of cells 1 and 2,  
761 respectively.

762 **Figure 2—figure supplement 1: 3-gene**  
 763 **models for pattern formation with Hill**  
 764 **functions for the weights.** (A) Schematic of the  
 765 gene regulatory networks encoded by the dynamic  
 766 term (dotted line) and the static term (solid line). (B)  
 767 Kymograph showing the dynamics of parameter  $g$   
 768 used in the simulated embryos for both Models 3 and  
 769 4. (C-H) Simulation results for Model 3. (C) Weights of  
 770 the dynamic (dotted line) and static (solid line)  
 771 enhancers as a function of parameter  $g$ . (D) Gene  
 772 concentration and value of parameter  $g$  inside a  
 773 representative simulated cell as a function of time. (E)  
 774 Kymograph showing the dynamics of gene expression  
 775 in the simulated embryo. (F) Schematic of the final  
 776 pattern. (G) Bifurcation diagram showing the types of  
 777 dynamics available to the simulated embryo as a  
 778 function of parameter  $g$ . (H) Period (grey line) and  
 779 amplitude (red line) of the oscillations along the stable  
 780 limit cycle. (I-N) Simulation results for Model 4.

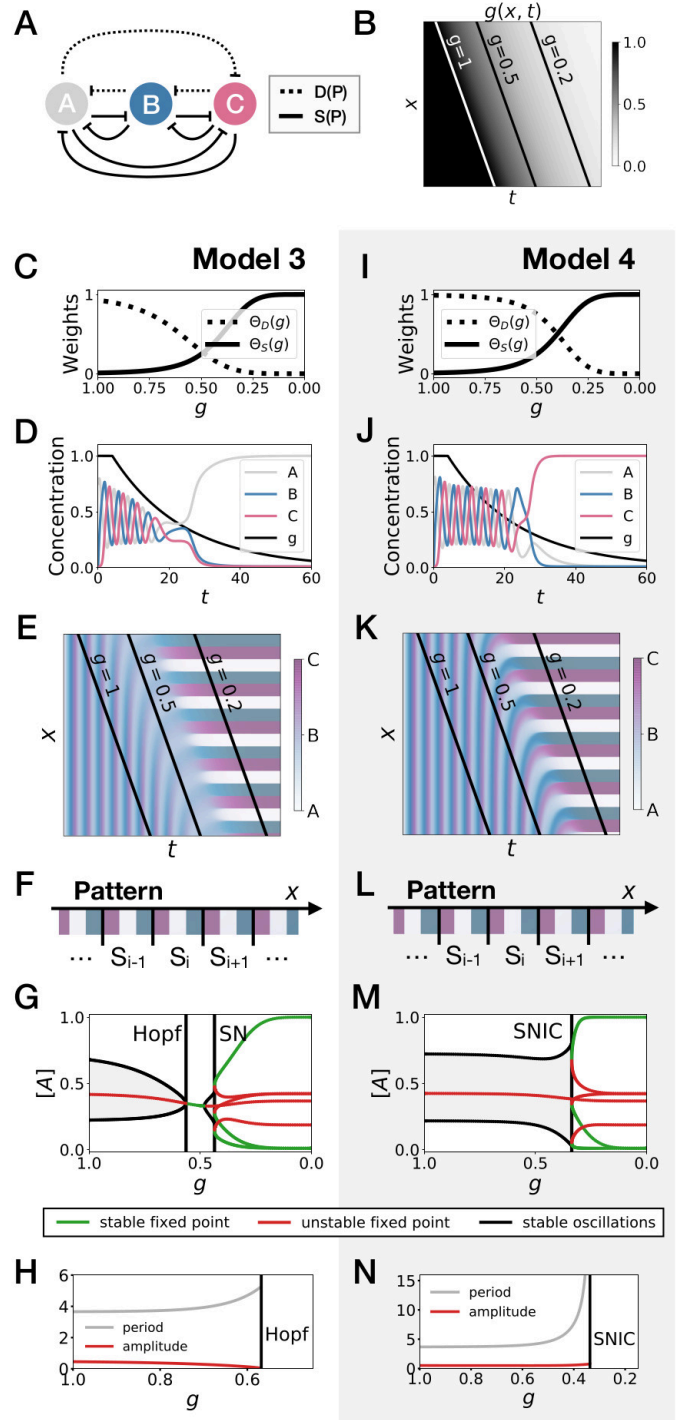

781 **Figure 2—figure supplement 2: Peak-to-**  
782 **peak frequency in the 3-gene models.**

783 The red and black dots represent the normalized peak-  
784 to-peak frequency as a function of the position along  
785 the antero-posterior (AP) axis for Models 1 and 2,  
786 respectively. These data points were computed  
787 numerically by using equation 2 of (Giudicelli et al.,  
788 2007). The transparent red and black lines are the  
789 theoretical normalized frequencies of Models 1 and 2,  
790 respectively, obtained via bifurcation analysis. Note  
791 that after the Hopf bifurcation in Model 1, the system  
792 performs damped oscillations. It is therefore possible to  
793 extract a numerical peak-to-peak frequency even after  
794 the stable oscillations die during the Hopf bifurcation.

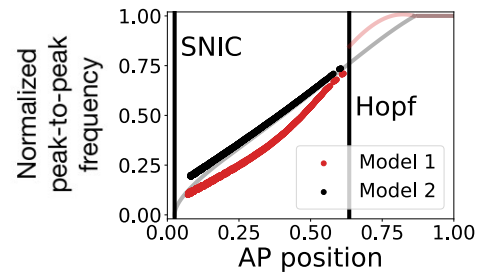

789 **Figure 3—figure supplement 1: Stochastic**  
 790 **simulations of the 3-gene models with Hill**  
 791 **functions for the weights.** (A-D) Kymographs  
 792 showing the stochastic dynamics of gene expression in  
 793 simulated embryos. The concentration of the three  
 794 genes at the last simulated time point is shown  
 795 schematically in the lower part of each panel. (E)  
 796 Mutual information as a function of typical  
 797 concentration  $\Omega$  for Model 1 (red lines) and Model 2  
 798 (black lines). Paler colors correspond to lower values  
 799 of the diffusion constant  $D$ . The thick horizontal black  
 800 line indicates the ideal mutual information for three  
 801 mutually exclusive genes.

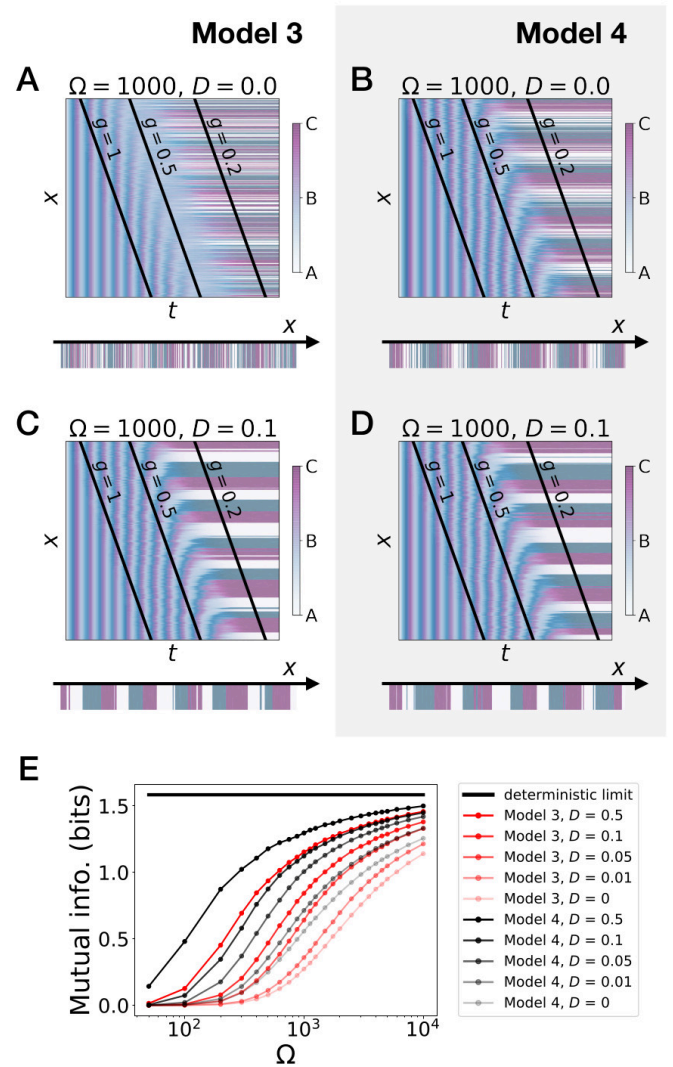

802 **Figure 4—figure supplement 1: Hopf**  
 803 **scenario in the 2D gene-free model.**

804 (A) Schematic of the flow encoded by the dynamic,  
 805 static and intermediate terms. (B) Weights of the  
 806 dynamic (dotted black line), static (solid black line) and  
 807 intermediate (solid red line) enhancers as a function of  
 808 parameter  $g$ . (C) Values of geometric coordinates  $y$   
 809 and  $z$ , and of parameter  $g$  in a simulated cell as a  
 810 function of time. (D) Kymograph showing the dynamics  
 811 of parameter  $g$  used in the simulated embryo. (E)  
 812 Kymograph showing the dynamics of geometric  
 813 coordinate  $y$ . (F) Schematic of the final pattern.  
 814 Bifurcation diagram showing the types of dynamics  
 815 available to the simulated embryo as a function of  
 816 parameter  $g$ . (H) Period (grey line) and amplitude (red  
 817 line) of the oscillations. (I) Flow in phase space for  
 818 different values of parameter  $g$ . The limit cycles are  
 819 represented by thick grey lines. Positions along the limit  
 820 cycle at time points separated by a fixed time interval  
 821 are indicated with black dots, such that the (absence of)  
 822 variations of the speed along the limit cycles can be  
 823 visualized. The yellow and orange lines represent the  
 824  $y$  and  $z$  nullclines, respectively. The green and red dots  
 825 represent stable and unstable fixed points, respectively.

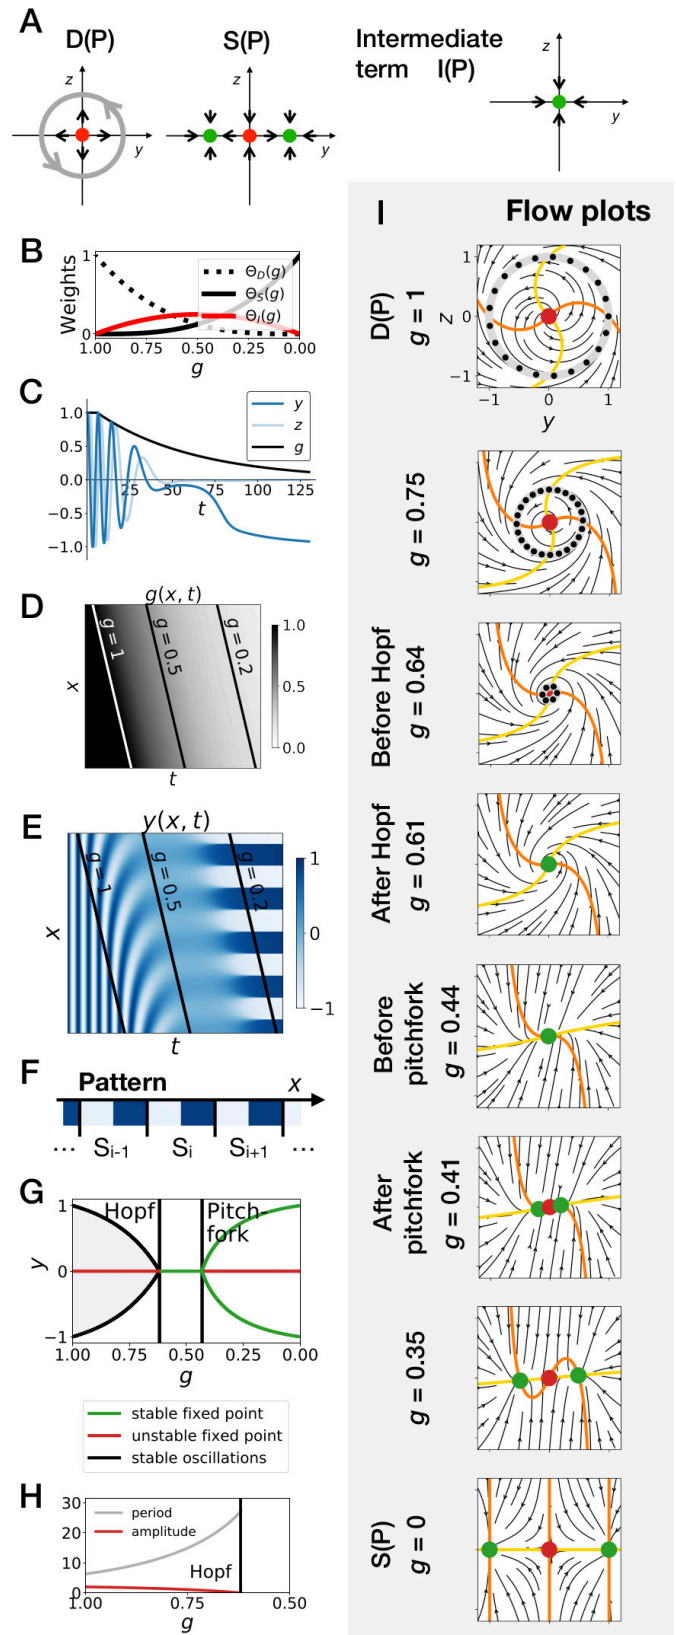

826 **Figure 4—figure supplement 2: Stochastic**  
827 **simulations of the gene-free models.**  
828 (A-B) Kymographs showing the stochastic dynamics of  
829 variable  $y$  in simulated embryos. The specific value of  
830 parameter  $\Omega$  used to generate each kymograph is  
831 indicated on the panels. (C) Mutual information as a  
832 function of typical concentration  $\Omega$  for Model 1 (red line)  
833 and Model 2 (black line). The thick horizontal black line  
834 indicates the ideal mutual information for a pattern with  
835 two symmetric regions.

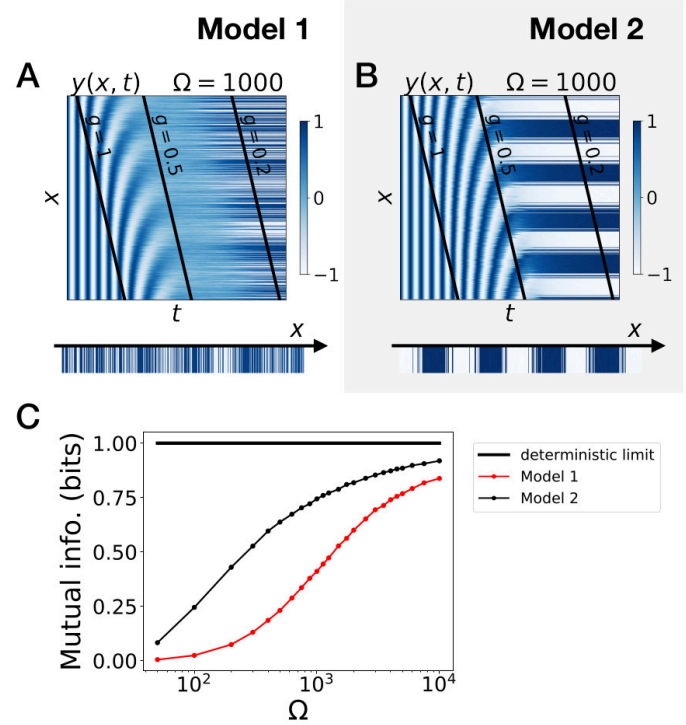



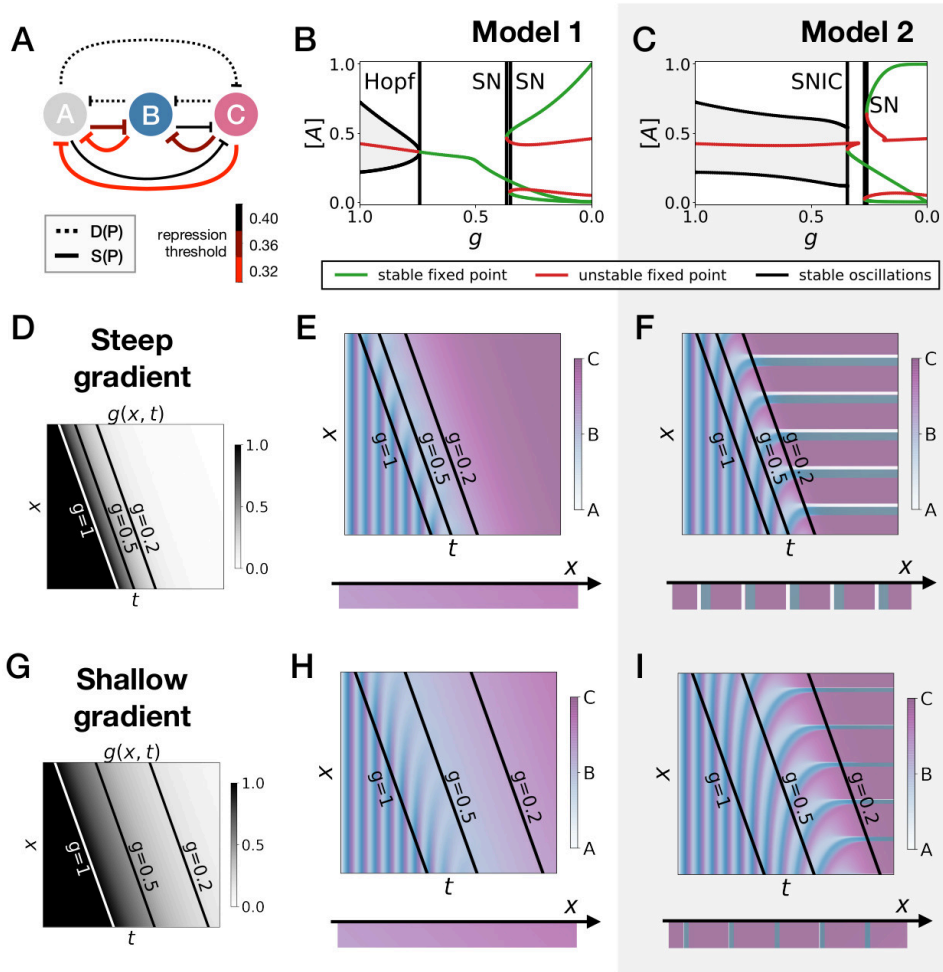

836 **Figure 5—figure supplement 1: Perturbations of the morphogen gradient**  
 837 **steepness in strongly asymmetric 3-gene models.** (A) Schematic of the gene regulatory  
 838 networks encoded by the dynamic (dotted line) and static (solid line) terms. For each interaction, the color  
 839 indicates the strength of the repression, with darker shades of red corresponding to weaker repression. (B-  
 840 C) Bifurcation diagram showing the types of dynamics available in Models 1 and 2. “SN” stands for saddle-  
 841 node bifurcation. (D-F) Simulation results for a steep gradient of parameter  $g$ . (D) Kymograph showing the  
 842 dynamics of parameter  $g$  used in the simulated embryos of both Models 1 and 2. (E) Kymograph showing  
 843 the dynamics of gene expression in the simulated embryos of Model 1. The concentration of the three  
 844 genes at the last simulated time point is shown schematically in the lower part of the panel. (F) Kymograph  
 845 showing the dynamics of gene expression in the simulated embryos of Model 2. (G-I) Simulation results for  
 846 a shallow gradient of parameter  $g$ .

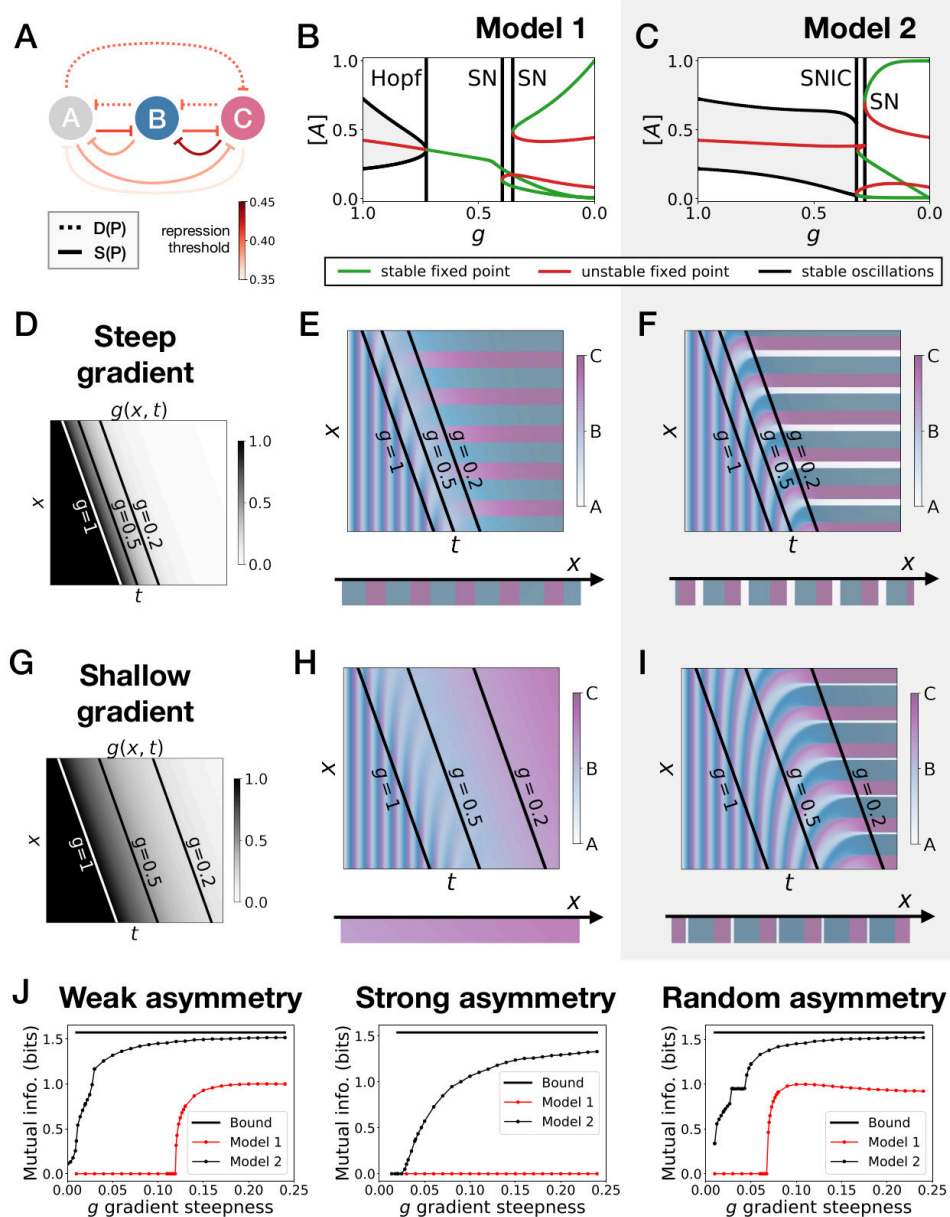

847 **Figure 5—figure supplement 2: Perturbations of the morphogen gradient**

848 **steepness in randomly asymmetric 3-gene models.** (A) Schematic of the gene regulatory

849 networks encoded by the dynamic (dotted line) and static (solid line) terms. For each interaction, the color

850 indicates the strength of the repression, with darker shades of red corresponding to weaker repression.

851 (B-C) Bifurcation diagram showing the types of dynamics available in Models 1 and 2. “SN” stands for

852 saddle-node bifurcation. (D-F) Simulation results for a steep gradient of parameter  $g$ . (D) Kymograph

853 showing the dynamics of parameter  $g$  used in the simulated embryos of both Models 1 and 2. (E)



854 Kymograph showing the dynamics of gene expression in the simulated embryos of Model 1. The  
855 concentration of the three genes at the last simulated time point is shown schematically in the lower part of  
856 the panel. (F) Kymograph showing the dynamics of gene expression in the simulated embryos of Model 2.  
857 (G-I) Simulation results for a shallow gradient of parameter  $g$ . (J) Mutual information as a function of the  
858 steepness of the  $g$  gradient for Models 1 (red line) and 2 (black line). The thick horizontal black line indicates  
859 the theoretical upper bound. The left, center and right subpanels show respectively the mutual information  
860 for models with a weak asymmetry in the fixed points of the static term (Fig. 5), with a strong asymmetry  
861 (Supp. Fig. 7) and with a random asymmetry (this figure).

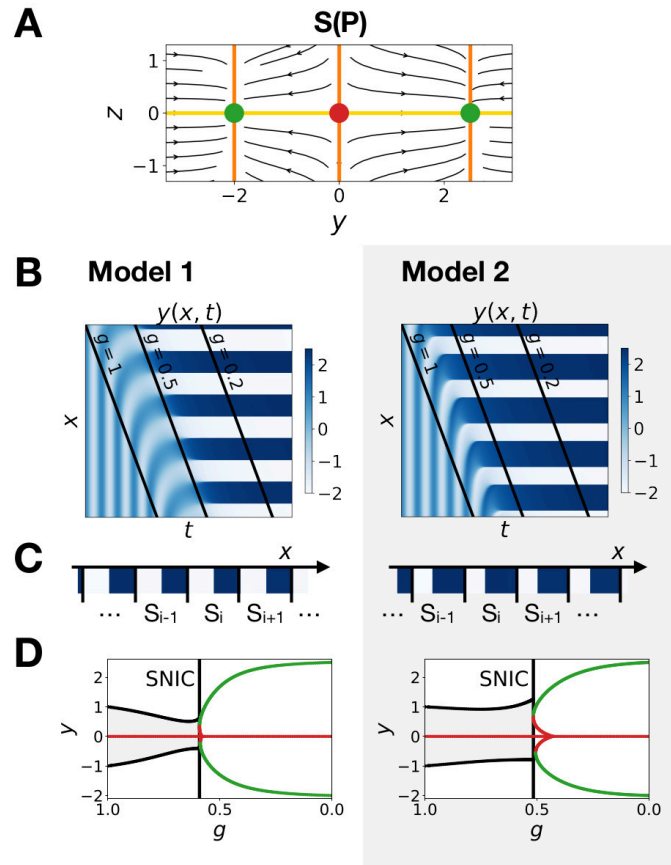

862 **Figure 6—figure supplement 1: Model 1 becomes a SNIC when fixed points are**  
 863 **outside the limit cycle.** (A) Flow plots showing the change of geometry of the static module. (B-C)  
 864 Corresponding kymographs and final patterns for Models 1 and 2. (D) Associated bifurcations diagrams.

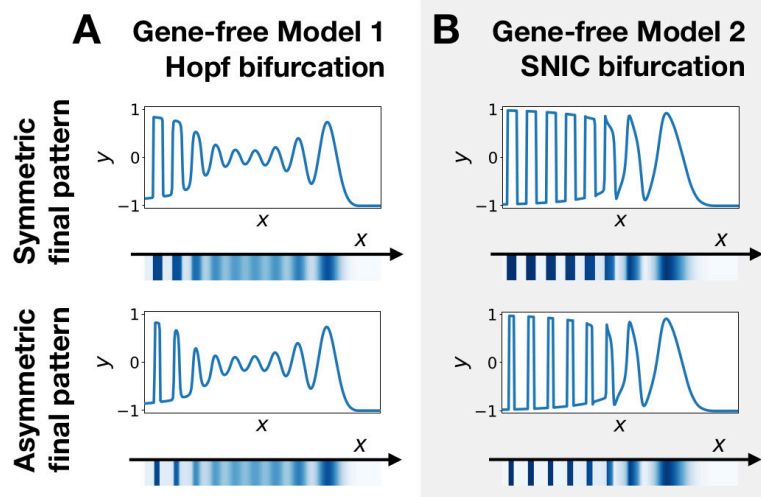

865 **Figure 7—figure supplement 1: Wave pattern in different versions of the 2D gene-**  
866 **free model.** (A) Wave patterns of the gene-free Model 1 with a Hopf bifurcation. The top and bottom  
867 subpanels show the wave pattern for symmetric and asymmetric fixed points in the static term, respectively.  
868 (B) Wave patterns of the gene-free Model 2 with a SNIC bifurcation.

## 869 **Supplementary Movie Legends**

### 870 **Figure 4—movie supplement 1: Flow of the gene-free with a SNIC bifurcation.**

871 Flow in phase space as parameter  $g$  goes from 1 to 0. The limit cycles are represented  
872 by thick grey lines. The yellow and orange lines represent the  $y$  and  $z$  nullclines,  
873 respectively. The green and red dots represent stable and unstable fixed points,  
874 respectively.

875

### 876 **Figure 4—movie supplement 2: Flow of the gene-free with a Hopf bifurcation.**

877 Flow in phase space as parameter  $g$  goes from 1 to 0. The limit cycles are represented  
878 by thick grey lines. The yellow and orange lines represent the  $y$  and  $z$  nullclines,  
879 respectively. The green and red dots represent stable and unstable fixed points,  
880 respectively.

881

### 882 **Figure 7—movie supplement 1: Comparison of pattern formation dynamics in**

883 **different models.** Dynamics of the spatial wave patterns in four models: a phase model  
884 with diverging period similar to the infinite-period scenario of Figure 1, the symmetric  
885 gene-free Model 1, the symmetric gene-free Model 2, and the asymmetric gene-free  
886 Model 2.
